# Supplementary material for: Mutations in FAM50A suggest that Armfield XLID syndrome is a spliceosomopathy
Source: PubMed Central journal article supplement (PMC7378245; doi:10.1038/s41467-020-17452-6), 2020-07-23
Supplement: 41467_2020_17452_MOESM1_ESM.pdf [file 41467_2020_17452_MOESM1_ESM.pdf]

Supplementary Information

**Mutations in *FAM50A* suggest that Armfield XLID syndrome  
is a spliceosomopathy**

Lee et al.

# Supplementary Figures

## Supplementary Figure 1

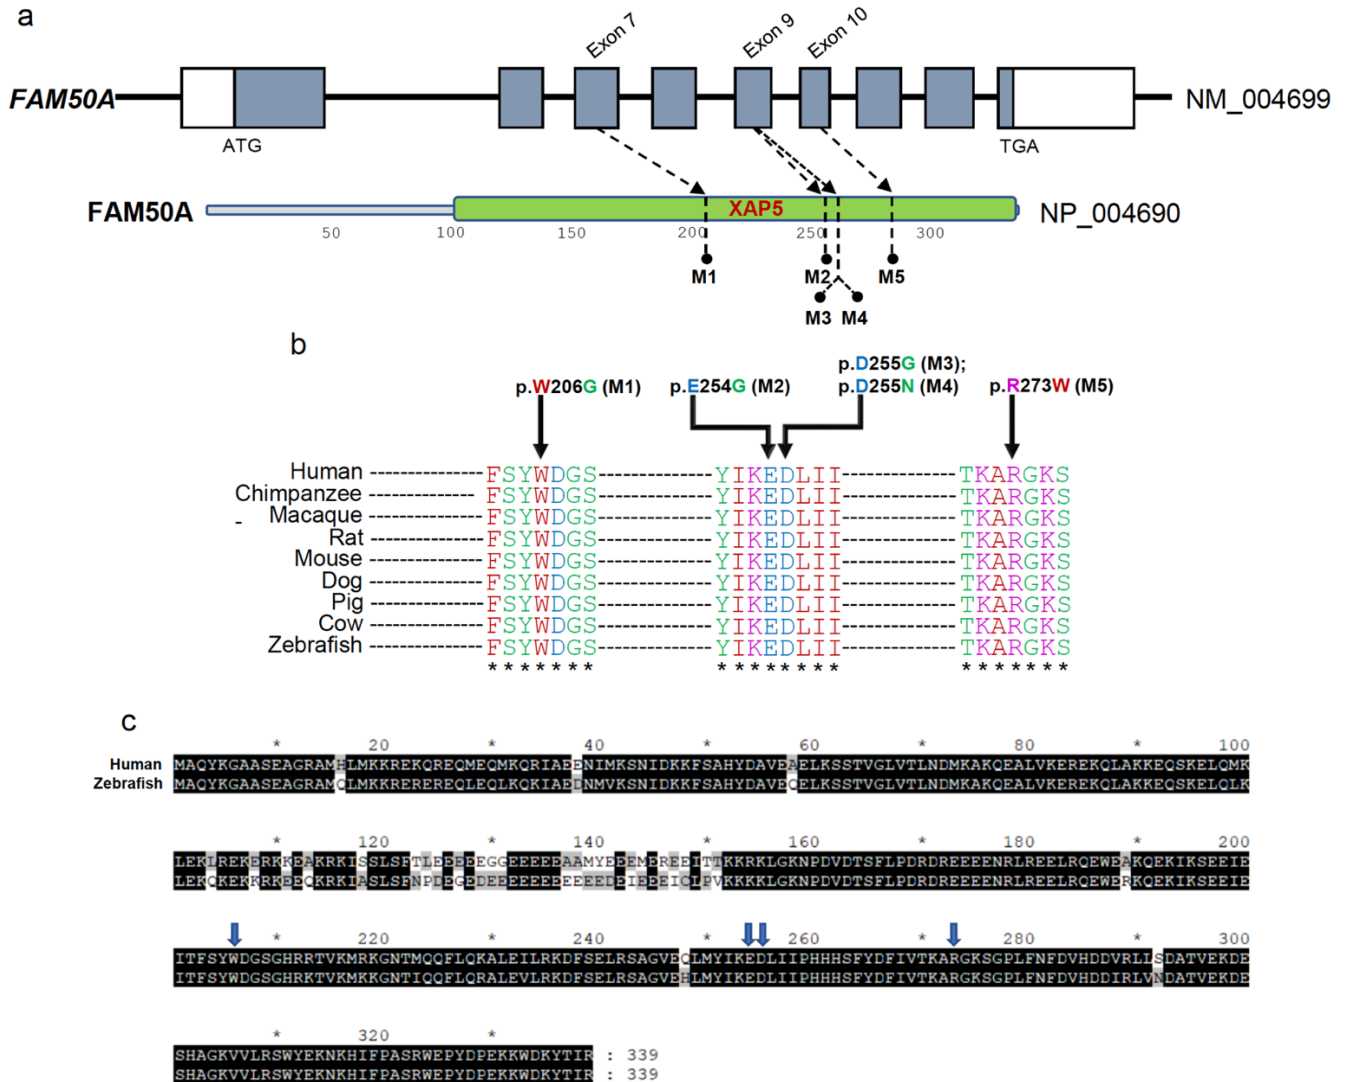

### Supplementary Figure 1. *FAM50A* missense variants are conserved across eukaryotic phyla.

a) Top, schematic of the *FAM50A* gene on Xq28, showing exons (boxes) and introns (black horizontal line); coding regions, blue; untranslated regions, white. Bottom, schematic of the *FAM50A* protein, and location of the five mutations on the XAP5 domain.

b) Multiple sequence alignment generated with Clustal Omega shows that all five *FAM50A* mutations are located in three regions conserved among vertebrates. Amino acid color scheme: Red- hydrophobic or aromatic (AVFPMILWY); blue- acidic (DE); magenta- basic (RHK); green- hydroxyl, amine, basic and glutamine (STYHCNGQ). Consensus symbols, an asterisk (\*) indicates positions which have a single, fully conserved residue.

c) Alignment of human *FAM50A* (NP\_004690.1) and zebrafish *Fam50a* (NP\_001017636.1) protein sequences generated with ClustalX. The zebrafish ortholog encodes a 339-amino-acid protein, with a high level of similarity (94%) to the human *FAM50A* protein. Black, conserved residue; blue arrows, location of variants identified in affected males.



### Supplementary Figure 3

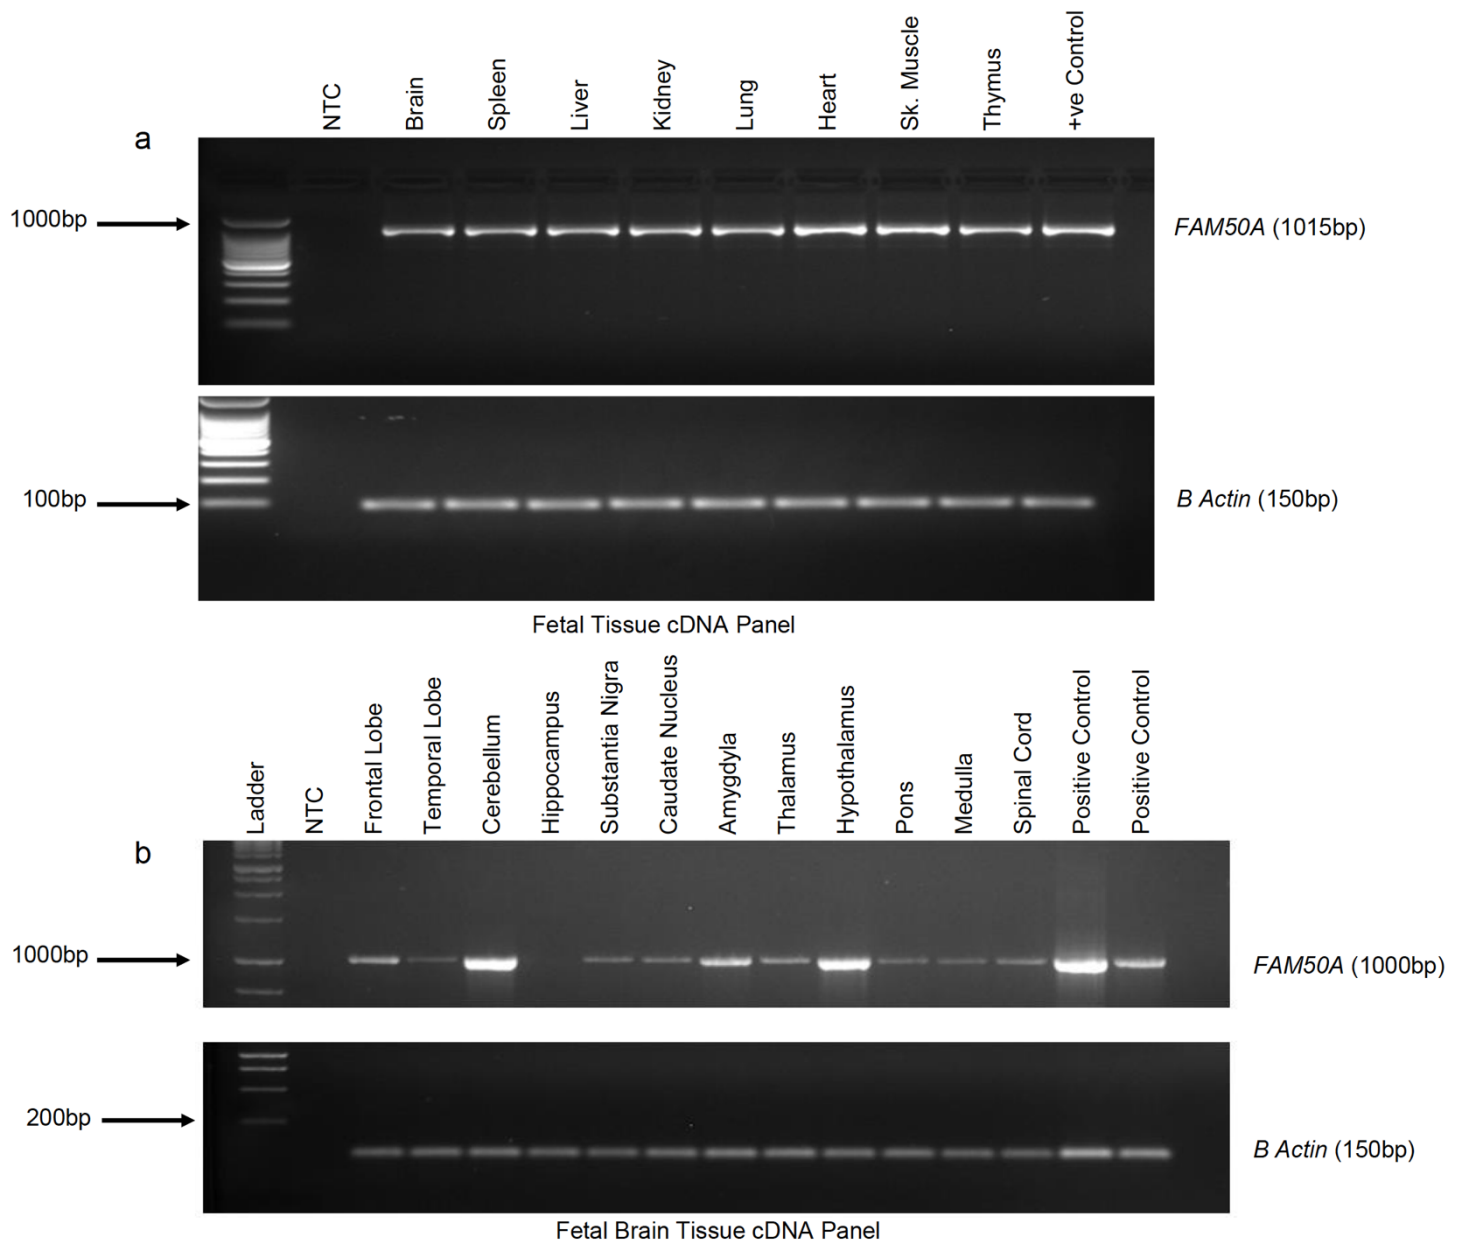

#### Supplementary Figure 3. *FAM50A* expression is ubiquitous.

a) Agarose gel images showing migration of RT-PCR products from multiple fetal tissues. *FAM50A* = 1015 bp.  $\beta$ -*Actin* = 150 bp. NTC, no-template control.

b) Agarose gel images showing migration of RT-PCR products from the Rapid Scan Human Fetal Brain panel. *FAM50A* = 1015bp,  $\beta$ -*Actin* = 150 bp.

Both experiments were repeated twice, with similar results; Uncropped gel images are shown in Source Data.



## Supplementary Figure 5

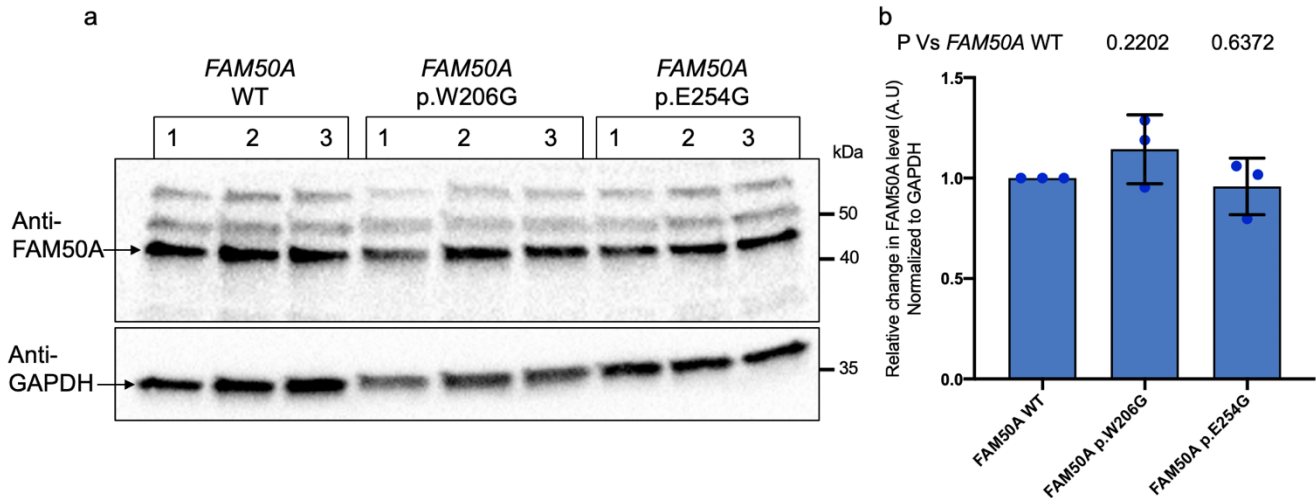

### Supplementary Figure 5. FAM50A patients showed no detectable differences in FAM50A protein level compared to control.

a) Western blot was performed on 23  $\mu$ g whole-cell protein lysate isolated from lymphocyte cell lines derived from individuals with *FAM50A* mutations (Family K9648, p.Trp206Gly; Family K9656, p.Gly254Gly) and an unrelated male control of European origin (*FAM50A* WT). The immunoblot was performed in three independent biological replicates for each condition using rabbit anti-FAM50A antibody (Novus Biologicals; Cat # NBP1-89344; 1: 900 dilution) and mouse anti-GAPDH antibody (Santa Cruz Biotechnology, Cat# sc-47724; 1:3000 dilution). FAM50A and GAPDH are indicated with black arrows. Uncropped blot image is shown in Source Data.

b) Chemiluminescence signal was quantified using Image Studio Lite and normalized to GAPDH in each condition. FAM50A protein abundance is shown relative to male control and statistical differences were calculated using an unpaired student's t-test (two-sided). Data are presented as mean values  $\pm$  standard deviation; (n= 3 biological replicates per condition).

# Supplementary Figure 6

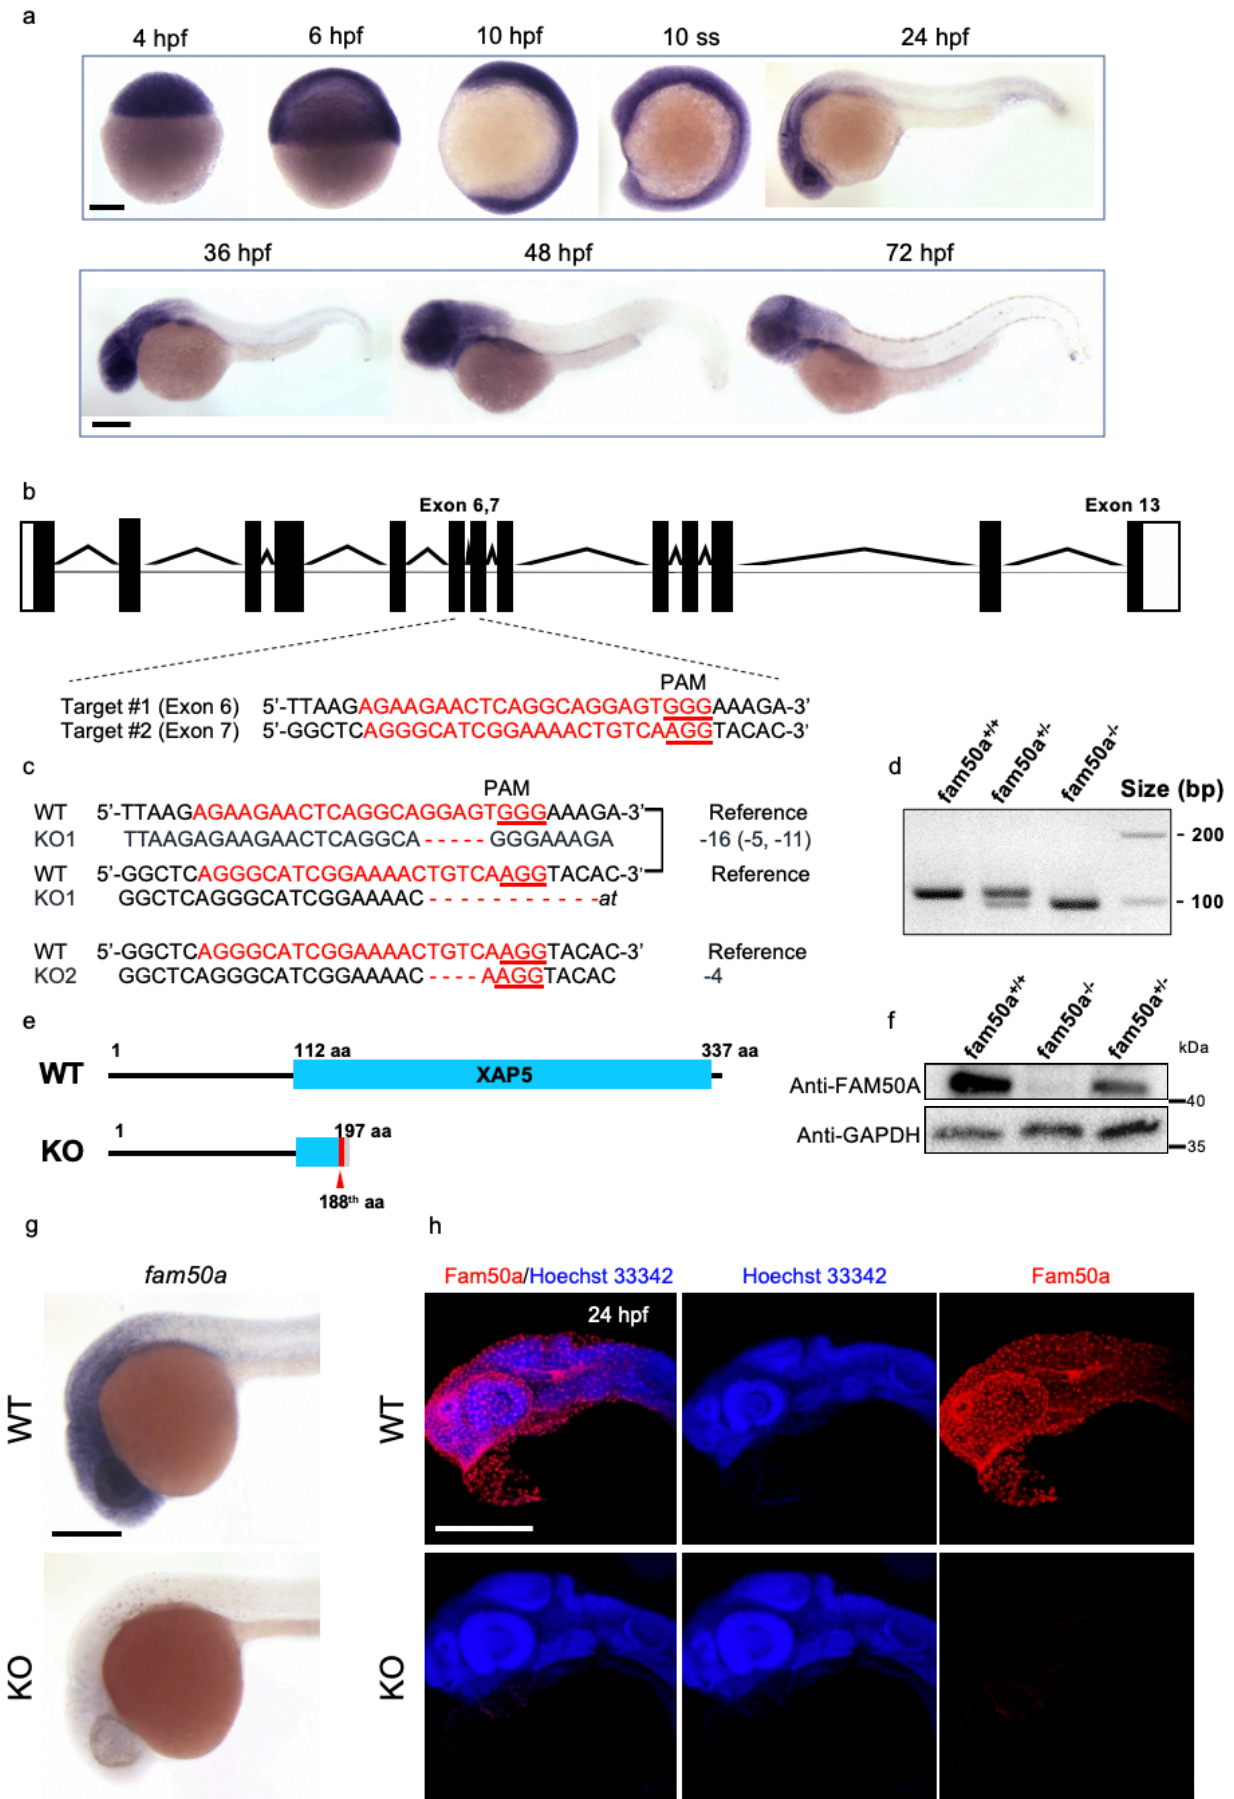

### Supplementary Figure 6. Generation and validation of the *fam50a* KO zebrafish model.

- a) Representative images of wholemount RNA *in situ* (WISH) to monitor expression of *fam50a* during zebrafish development from 4 hours post-fertilization (hpf) through 72 hpf. n=5 embryos examined at each stage; each experiment was repeated three times with similar results. Scale bar: 200  $\mu\text{m}$ , with equivalent sizing across panels.
- b) Schematic showing the genomic structure of zebrafish *fam50a* (GRCz10: GENSDART00000037501.8) and target sites for knock out (KO) generation by CRISPR-Cas9. Black boxes, coding regions; white boxes, untranslated regions; black lines, introns.
- c) Targeted sequence for CRISPR guide RNAs. Identification of 4 bp and compound 11+5 bp deletion (KO) mutants. Phenotyping data in this study correspond to KO1.
- d) Representative agarose gel image of PCR products used to genotype *fam50a* zebrafish mutants. n=20 embryos; repeated 12 times with similar results; uncropped images are shown in the Source Data.
- e) Predicted structure of WT and *fam50a* KO mutant proteins. The compound 11+5 bp deletion resulted in a frame-shifting mutation with premature termination in the XAP5 domain.
- f) FAM50A western blot was performed on protein lysates isolated from zebrafish heads. Zebrafish heads were cross-matched with genotyping performed on DNA extracted from zebrafish tails and 20 embryos were pooled per genotype to isolate total protein lysate. A total of 8  $\mu\text{g}$ /lane protein was migrated on 4-15% polyacrylamide gels and anti-FAM50A rabbit poly-clonal antibody (Novus Biologicals; Cat # NBP1-89344; 1:900 dilution) was used to detect native protein. GAPDH was used as loading control. Repeated twice, with similar results; uncropped images are shown in the Source Data.
- g) Representative images of WISH demonstrate loss of *fam50a* expression in KO zebrafish at 24 hpf. n=19 embryos assessed; repeated twice with similar results. Scale bar: 200  $\mu\text{m}$ , equivalent sizing across panels.
- h) Wholemount immunofluorescence of Fam50a protein in WT and *fam50a* KO mutant zebrafish at 24 hpf. Confocal image shows Fam50a (red), and nuclei counterstained with Hoechst 33342 (blue). Fam50a protein was not detectable in *fam50a* KO embryos. n=12 embryos assessed with similar results. Scale bar: 200  $\mu\text{m}$ , equivalent sizing across panels.



Supplementary Figure 7

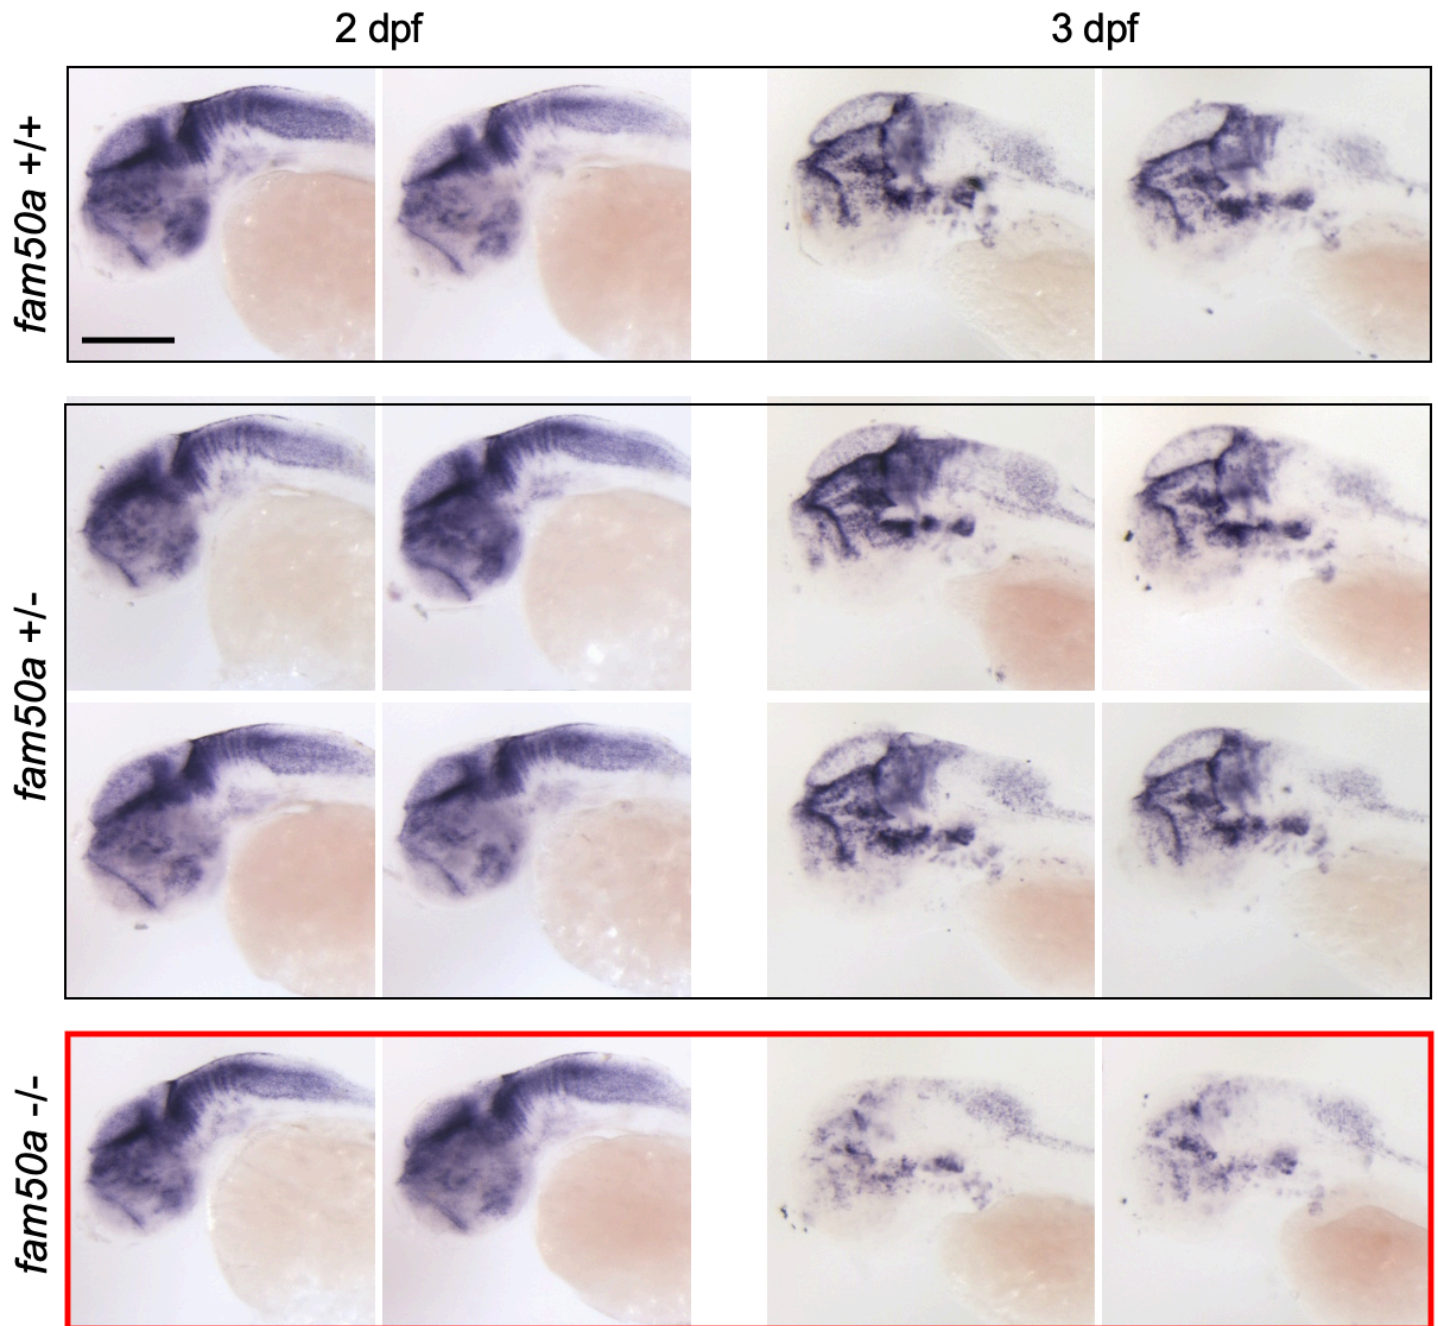

**Supplementary Figure 7. Validation of zebrafish RNAseq data using RNA *in-situ* hybridization assays.**

*In situ* expression of *her4.1* in *fam50a* KO zebrafish larvae ( $^{-/-}$ ) is similar to wild-type (WT,  $^{+/+}$ ) and *fam50a* $^{+/-}$  (heterozygotes) at 2 days post-fertilization (dpf) but depleted at 3 days post-fertilization. Images of representative larvae are shown; related to Figure 2c. Number of embryos evaluated: 2 dpf, n=24; 3 dpf, n=21; repeated twice with similar results. Scale bar; 200  $\mu$ m, with equivalent sizing across panels.

## Supplementary Figure 8

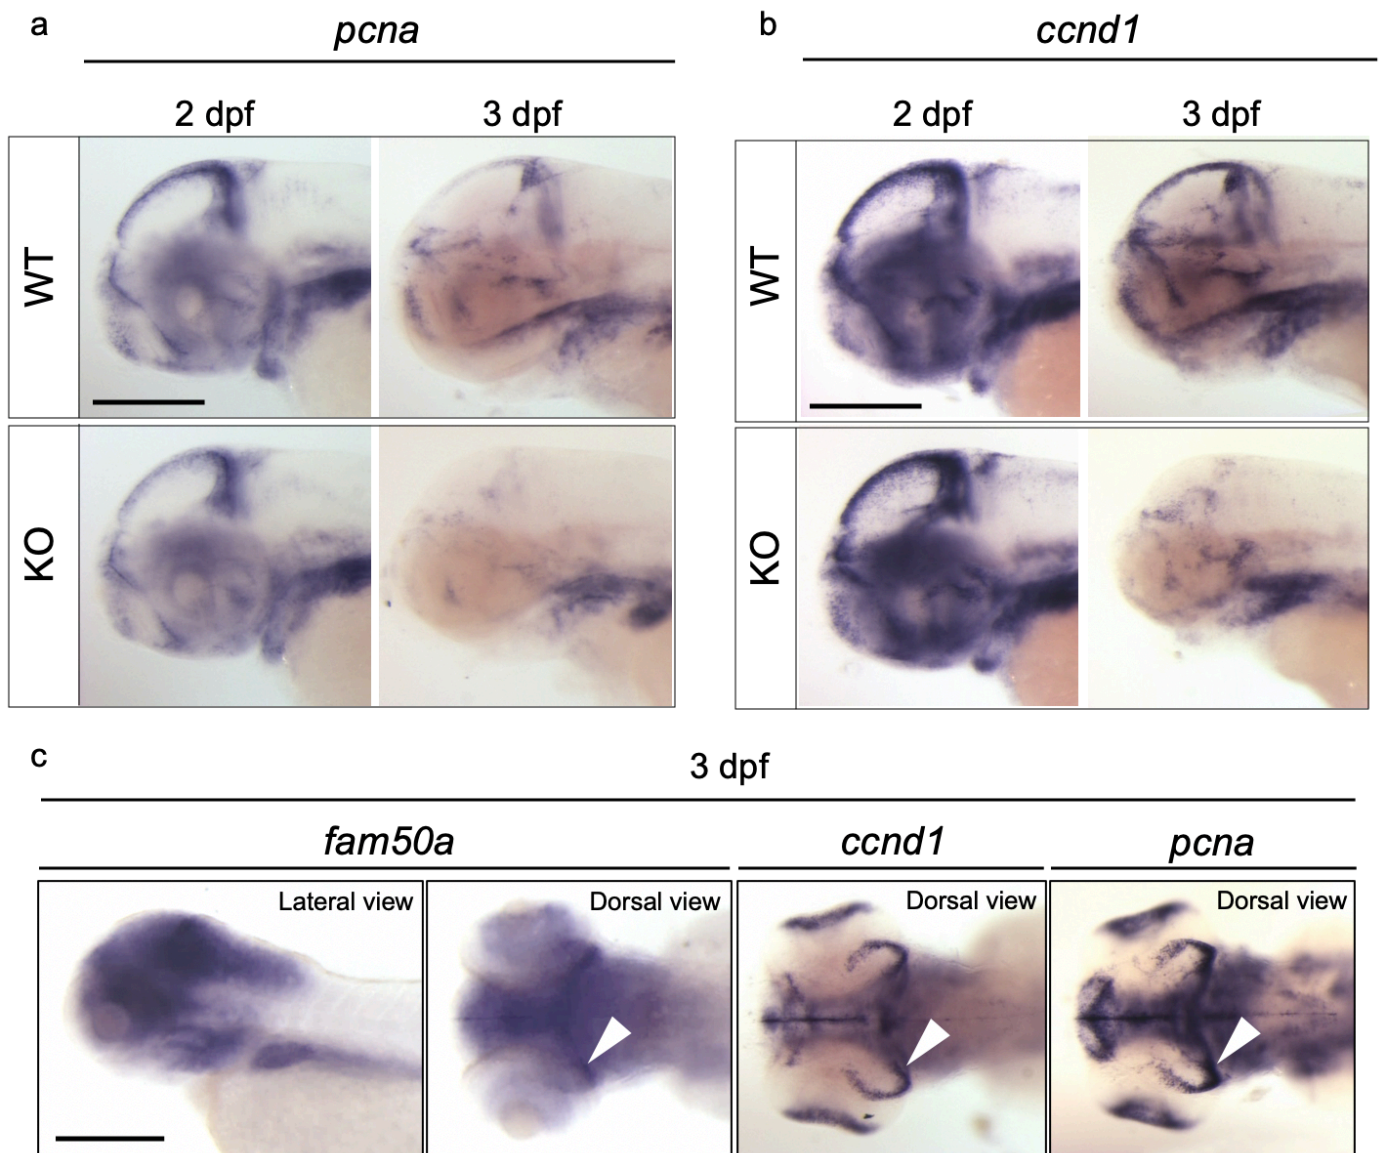

### Supplementary Figure 8. *In situ* expression of cell proliferation markers in *fam50a* KO zebrafish larvae is depleted.

Cell proliferation markers showed no detectable change in *fam50a* KO zebrafish at 2 days post-fertilization (dpf), however, significant reduction was noticed at 3 dpf.

a) Proliferating cell nuclear antigen (*pcna*); 2 dpf, n=16; 3 dpf, n=18 and

b) Cyclin D1 (*ccnd1*) mRNA expression. 2 dpf, n=19; 3 dpf, n=16.

c) Comparison of *fam50a*, *ccnd1* and *pcna* expression in WT larvae at 3 dpf show a similar pattern of concentrated expression in the proliferative zone of the midbrain (white arrow). *fam50a*, n=5; *ccnd1*, n=16; *pcna*, n=18. Experiments were repeated two times, with similar results. Scale bars; 200  $\mu$ m, with equivalent sizing across panels.

## Supplementary Figure 9

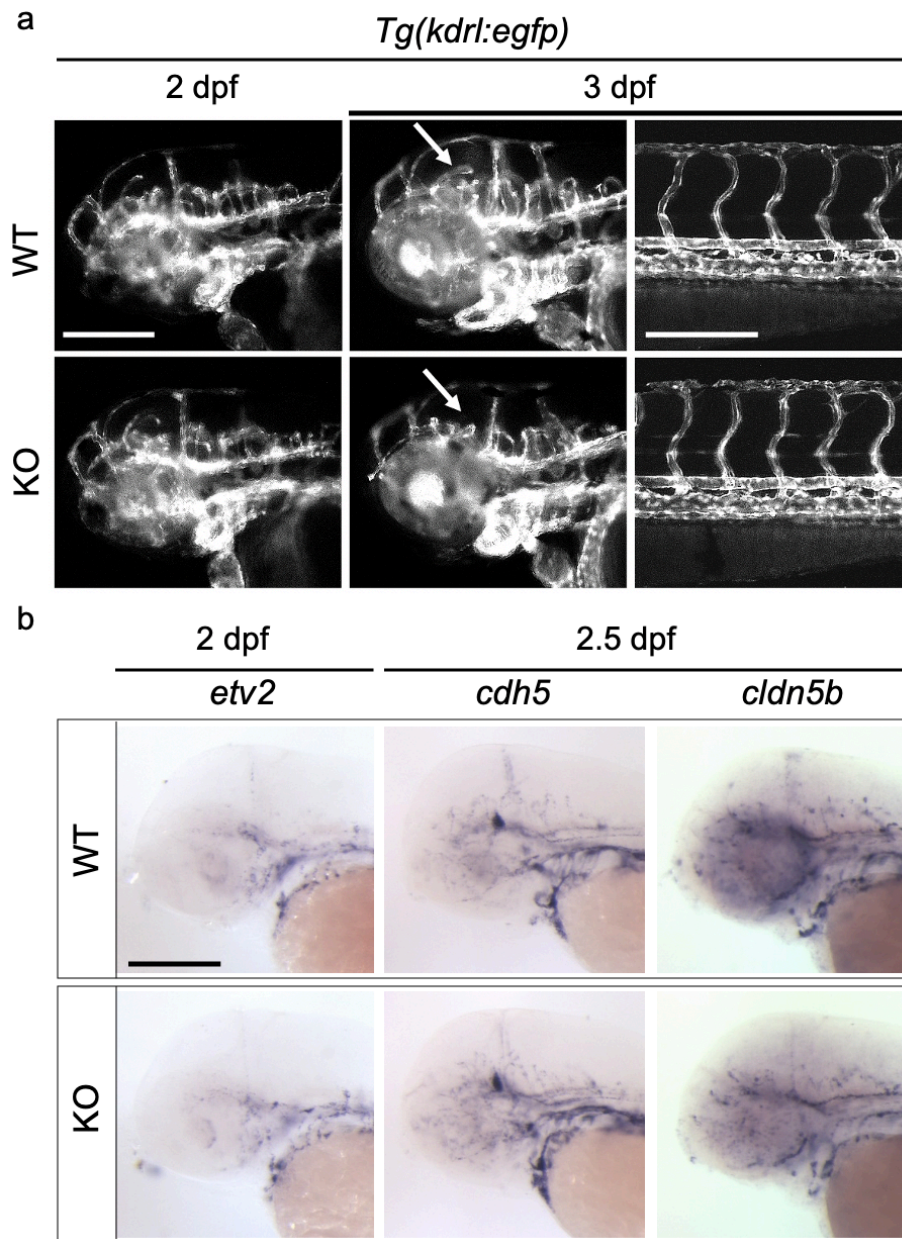

### Supplementary Figure 9. *fam50a* KO zebrafish larvae display normal blood vessel patterning.

a) Endothelial-specific expression of GFP in the transgenic *tg(kdrl:egfp);fam50a* KO zebrafish at 2 days post-fertilization (dpf) and 3 dpf. Blood vessel defects are first detectable in the midbrain region of 3 dpf KO zebrafish larvae (arrows). However, intersegmental vessels in the trunk region are relatively normal in the 3 dpf KO zebrafish, compared to WT. Number of larvae assessed, with similar results: 2 dpf, n=24; 3 dpf, n=11. Scale bar: 200  $\mu$ m, with equivalent sizing across panels.

b) Wholemount *in situ* analysis of vascular markers in *fam50a* KO zebrafish larvae shows relatively normal mRNA expression at 2- and 2.5-day post-fertilization (dpf). Molecular markers used: *etv2*, ETS variant 2; *cdh5*, Cadherin 5; and *cldn5b*, Claudin 5b. Number of larvae assessed, with similar results: *etv2*, n=17; *cdh5*, n=18; *cldn5b*, n=28. Blood vessels were assessed in transgenic zebrafish in two independent replicate experiments and validated once by *in situ* expression of vascular markers. Scale bar: 200  $\mu$ m, with equivalent sizing across panels.

## Supplementary Figure 10

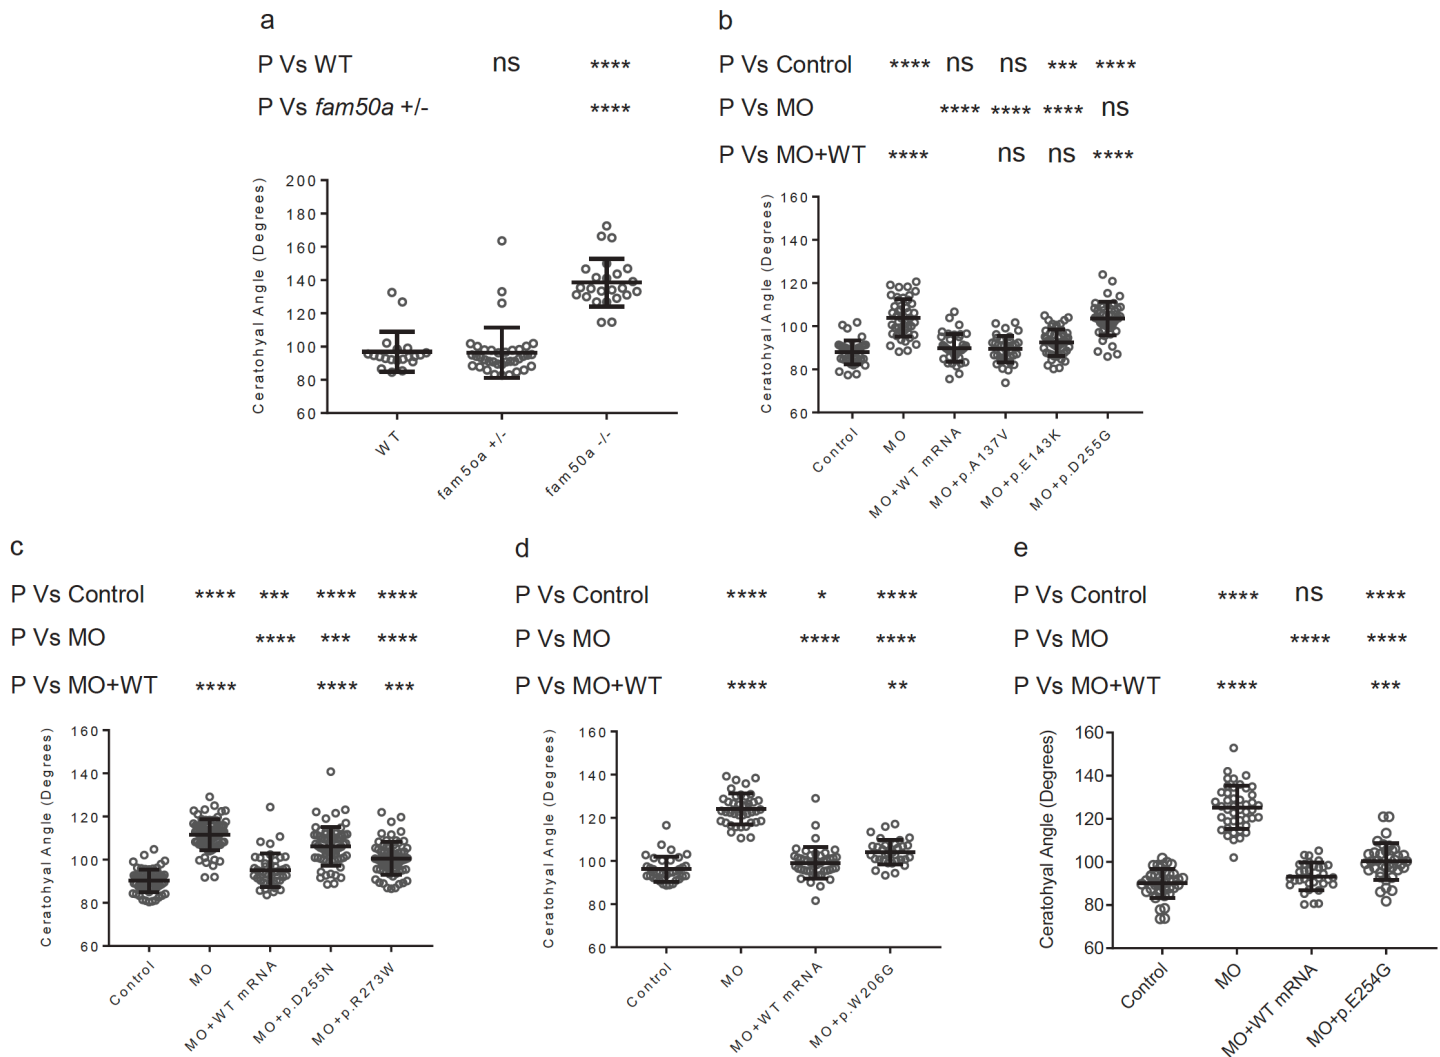

### Supplementary Figure 10. Dot plots representing ceratohyal angle measurements.

Dot plots correspond to individual *fam50a* KO and *in vivo* complementation phenotyping studies of craniofacial patterning (as measured by ceratohyal angle). Statistical differences were calculated using an unpaired student's t-test (two-sided); exact p-values and number of larvae are listed in Supplementary Table 4. \*, \*\*, \*\*\*, \*\*\*\* indicate  $p < 0.05$ ; 0.01; 0.001; and 0.0001, respectively. ns, not significant. Data are presented as mean values +/- standard deviation, experiments were repeated two times, with similar results (a) corresponds to Figure 3b; and (b, c, d and e) correspond to Figure 3c.

## Supplementary Figure 11

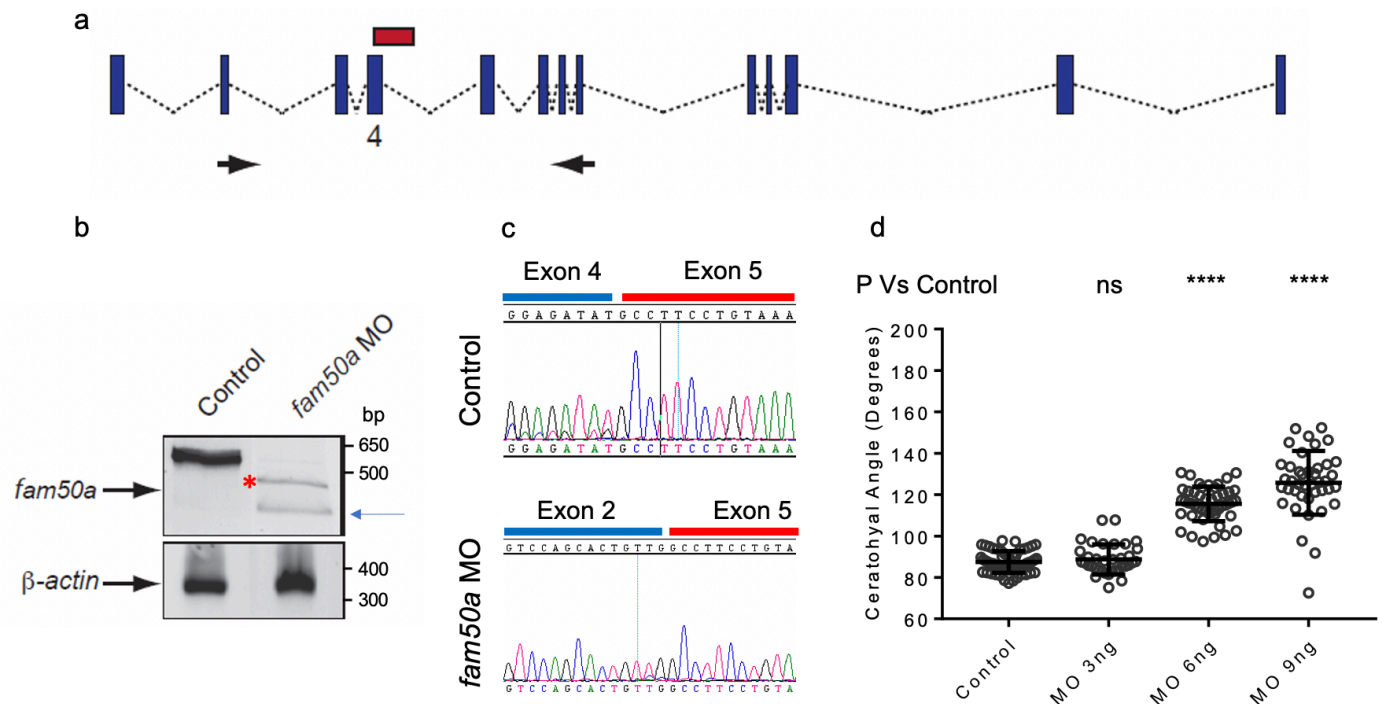

### Supplementary Figure 11. *fam50a* is targeted specifically by a splice-blocking morpholino.

a) Schematic of the *D. rerio fam50a* locus showing exons as blue boxes and introns as black dotted lines. The morpholino (MO) sequence is shown as a red rectangle targeting the splice donor site of exon 4; PCR primers are indicated as black arrows flanking the MO target region.

b) Agarose gel image (2%) showing migration of *fam50a* RT-PCR products amplified from the region flanking the MO target site; red star represents deletion of exon 3 and part of exon 4, blue arrow represents deletion of exons 3 and exon 4 (see c). *β-actin* was used to control for RNA integrity. See Source Data for uncropped gel image.

c) Sequence chromatograms of amplified region flanking the MO target site in morphants indicates deletion of exon 3 and exon 4 (arrow, see panel b).

d) Injection of increasing concentrations of *fam50a* MO resulted in a dose dependent craniofacial phenotype (increase in ceratohyal angle) in zebrafish larvae at 3 dpf. Statistical differences were calculated using an unpaired student's t-test (two-sided); Exact p-values and number of larvae are listed in the Supplementary Table 4; \*\*\*\* indicates  $p < 0.0001$ , ns, not significant; experiment repeated two times with similar results. Data are presented as mean values +/- standard deviation.

## Supplementary Figure 12

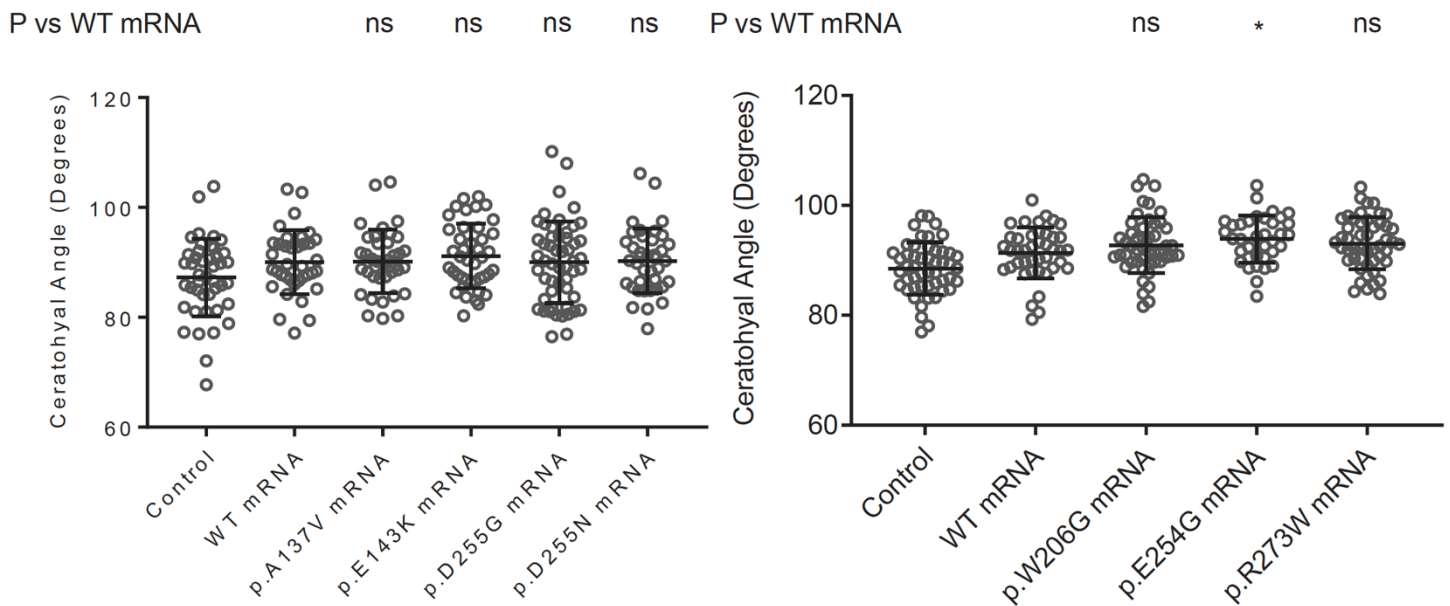

### Supplementary Figure 12. Injection of human *FAM50A* mRNA does not induce a significant effect on cartilage patterning in zebrafish larvae.

Capped *FAM50A* mRNA was injected into *-1.4col1a1:egfp* zebrafish embryos at the 1-4 cell stage; larvae were imaged live at 3 days post-fertilization (dpf) using the VAST Biolumager; and ceratohyal angle was measured. Statistical differences were calculated using an unpaired student's t-test (two-sided); \* indicates  $p < 0.05$ ; exact p-values and number of larvae are listed in Supplementary Table 4; ns, not significant; experiment was repeated two times with similar results. Data are presented as mean values  $\pm$  standard deviation.

## Supplementary Figure 13

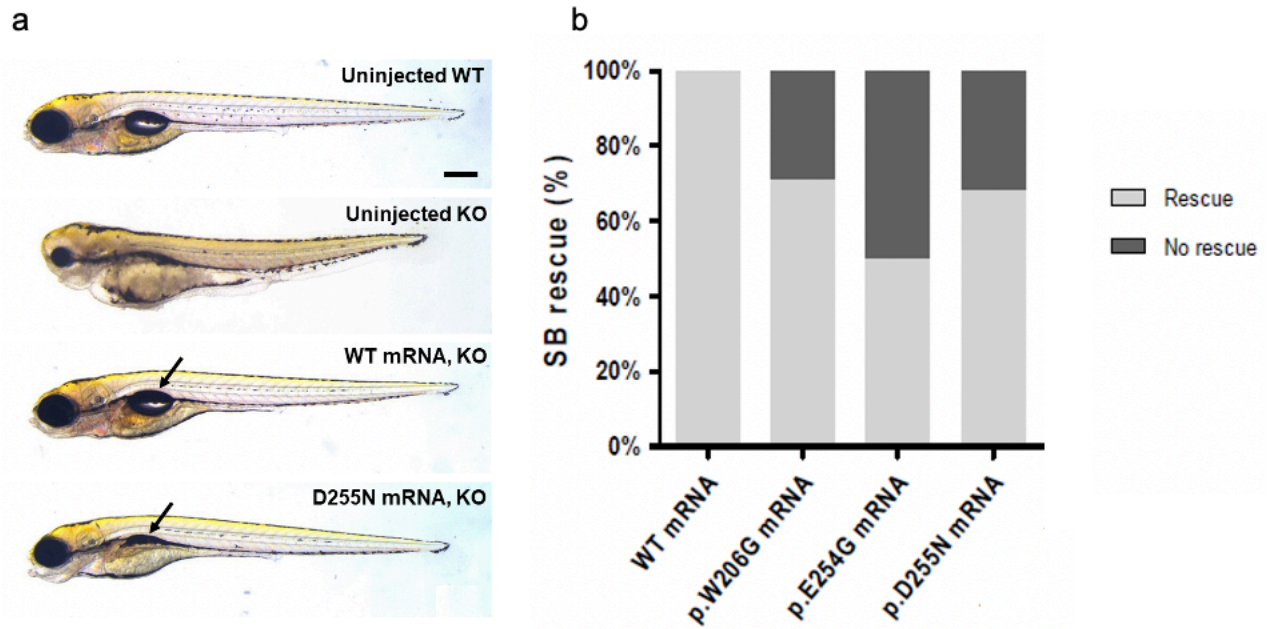

### Supplementary Figure 13. Swim bladder assay in *fam50a* KO zebrafish validates pathogenicity of *FAM50A* variants.

a) Rescue experiment of *fam50a* KO zebrafish with 300 pg human WT *FAM50A* mRNA injection or patient variant mRNA injection. KO phenotypes were rescued by WT *FAM50A* expression, but only partly rescued by patient variants. Swim bladder (SB) formation at 5 dpf was used as criteria for quantification of rescue measurement (arrows). Scale bar; 200  $\mu$ m, with equivalent sizing across panels.

b) Quantification of injected KO zebrafish rescued by SB formation (SB rescue, %). WT, n=24; p.Trp206Gly, n=65; p.Glu254Gly, n=46 and; p.Asp255Asn, n=88, repeated with similar results.

## Supplementary Figure 14

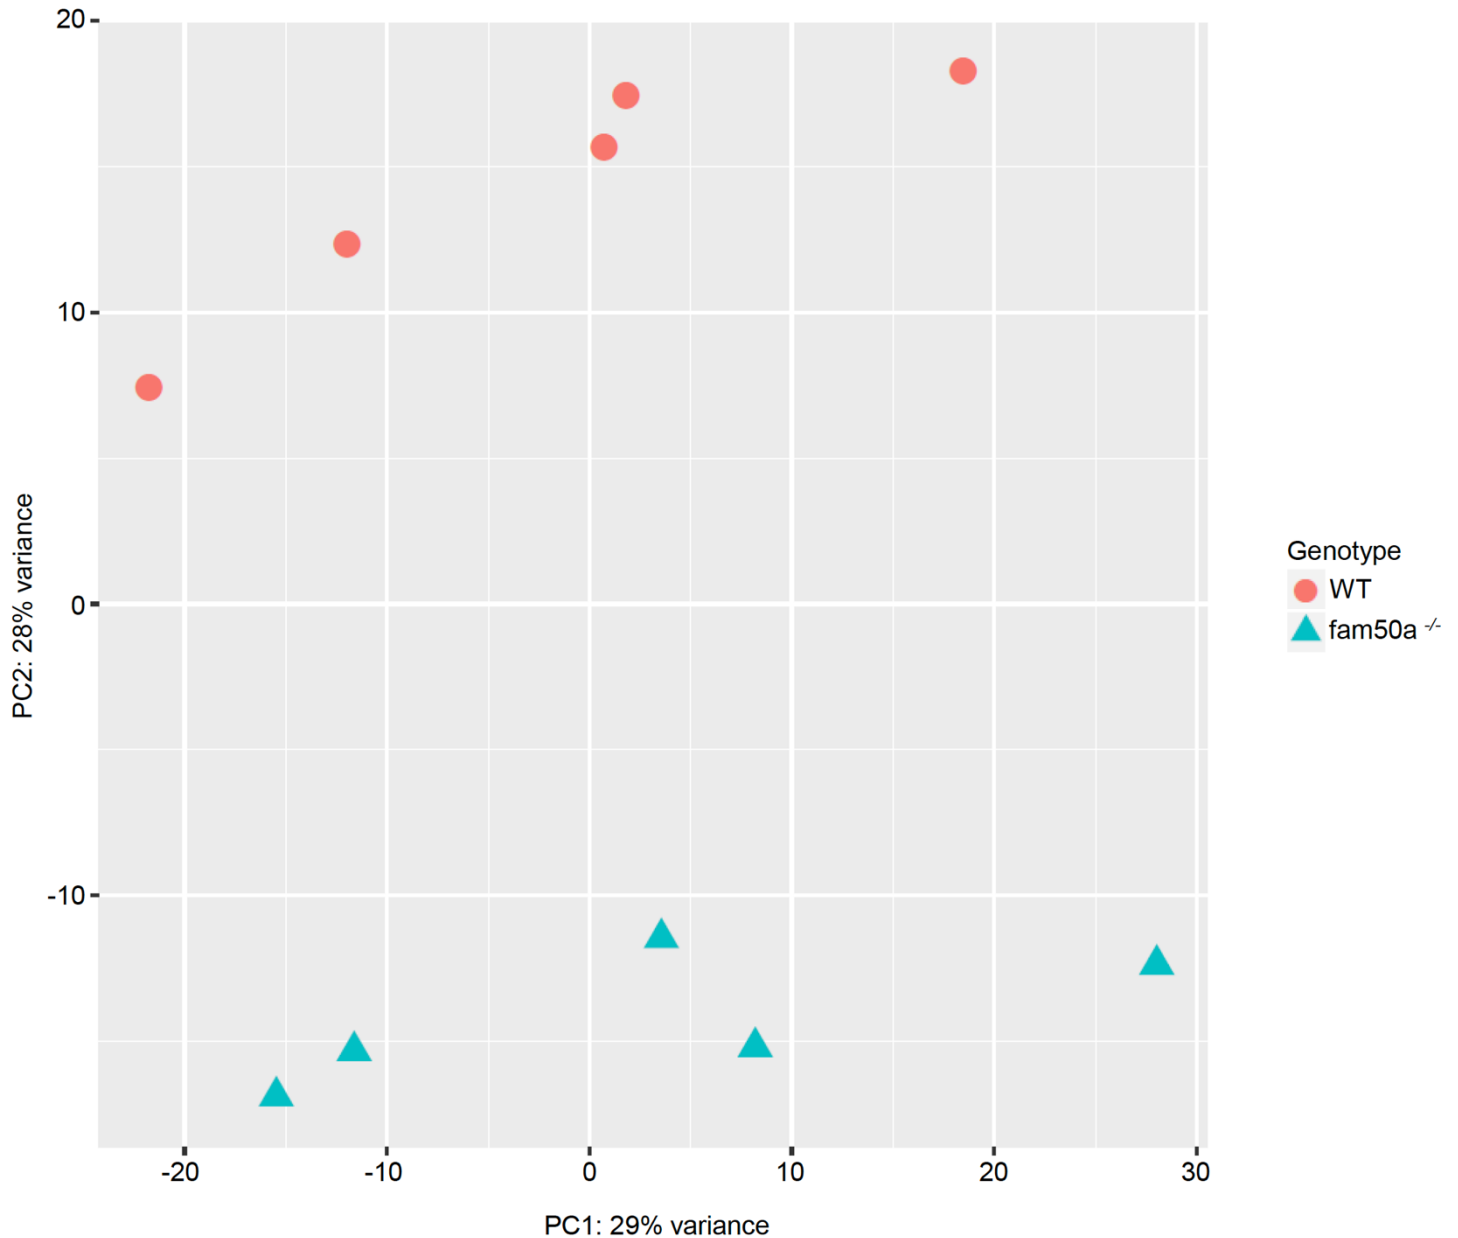

### Supplementary Figure 14. Clustering analysis of RNA-seq data generated on *fam50a* KO zebrafish.

Wild type and mutants are distributed into two distinct groups by principal component analysis (PCA). Samples separate out by genotype on PC2 (Y-axis), which explains 28% of the variance in the dataset. Wild type is shown with red circles, *fam50a* homozygous mutants are shown in green triangles. See NCBI Gene Expression Omnibus under accession number GEO: GSE145711 for source data.



## Supplementary Figure 15

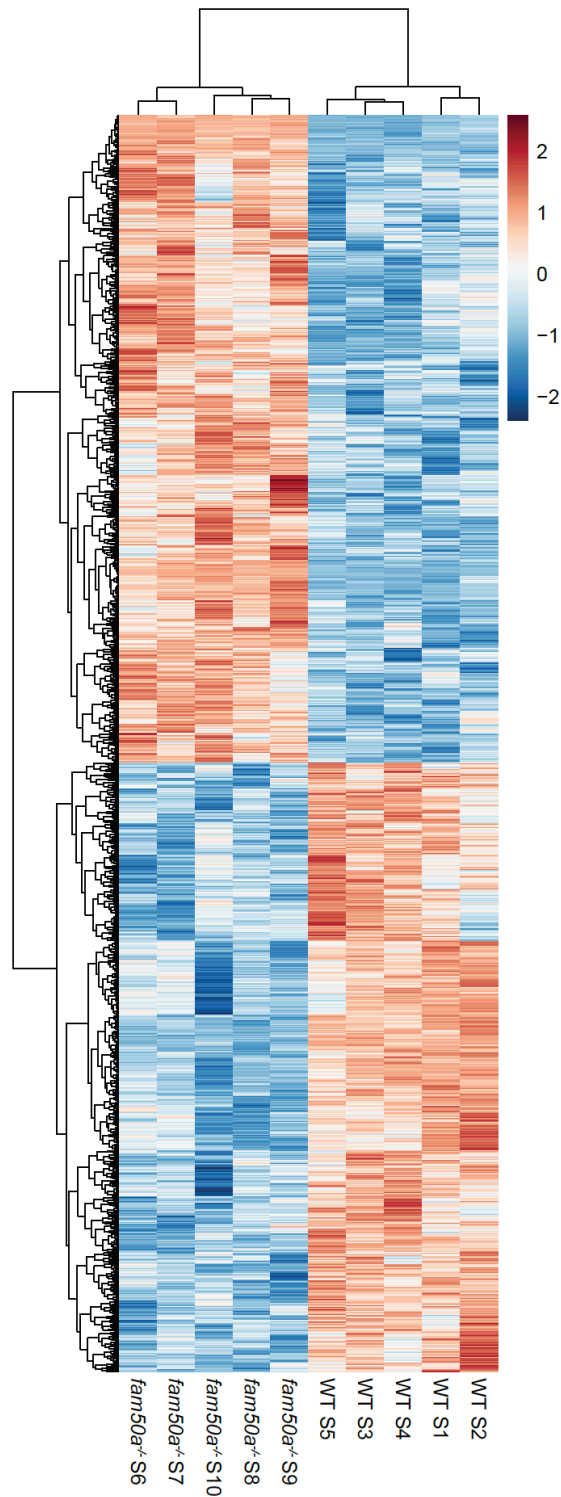

### Supplementary Figure 15. Heat map of differentially expressed genes in WT vs. *fam50a* KO.

Heat map of transcriptome data corresponding to five replicates of each WT and *fam50a* KO zebrafish sequencing library. Statistical differences were calculated using a Wald test, FDR corrected using the Benjamini-Hochberg method; only genes with p-value <0.05 and >2-fold-change are included for each WT vs *fam50a* KO comparison. Gene expression has been z-score normalized and the samples and genes are clustered by correlation distance with complete linkage. NCBI Gene Expression Omnibus under accession number GEO: GSE145711.

## Supplementary Figure 16

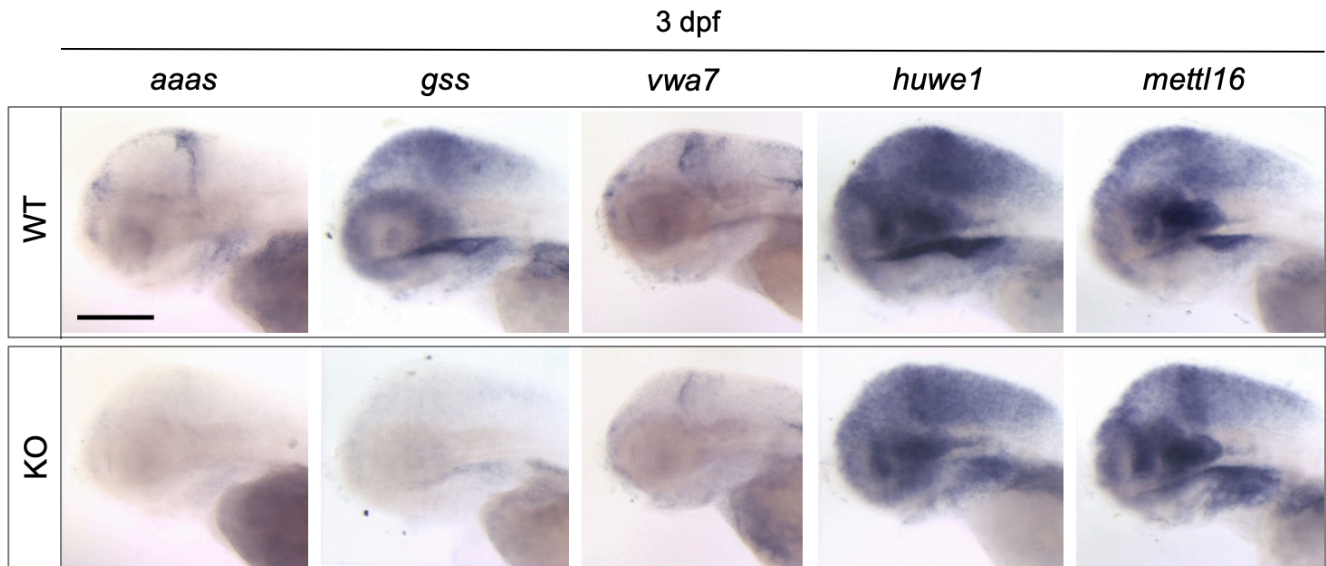

**Supplementary Figure 16. Validation of additional genes whose transcript levels were altered in RNAseq analysis of *fam50a* KO zebrafish.** Representative wholemount *in situ* hybridization (WISH) images. The transcript levels of *aaas*, *gss* and *vwa7* show reduced expression; and *mettl16* shows increased expression and were concordant with RNA-seq analysis. *huwe1* did not show significant differences between WT and *fam50a* KO according to RNA-seq but show modest reduction in expression according to WISH. See Table 2 for summary data. Number of larvae evaluated with similar results: *aaas*, n=11; *gss*, n=10; *vwa7*, n=11; *huwe1*, n=10; *mettl16*, n=10. Scale bar: 200  $\mu$ m, with equivalent sizing across panels.

## Supplementary Figure 17

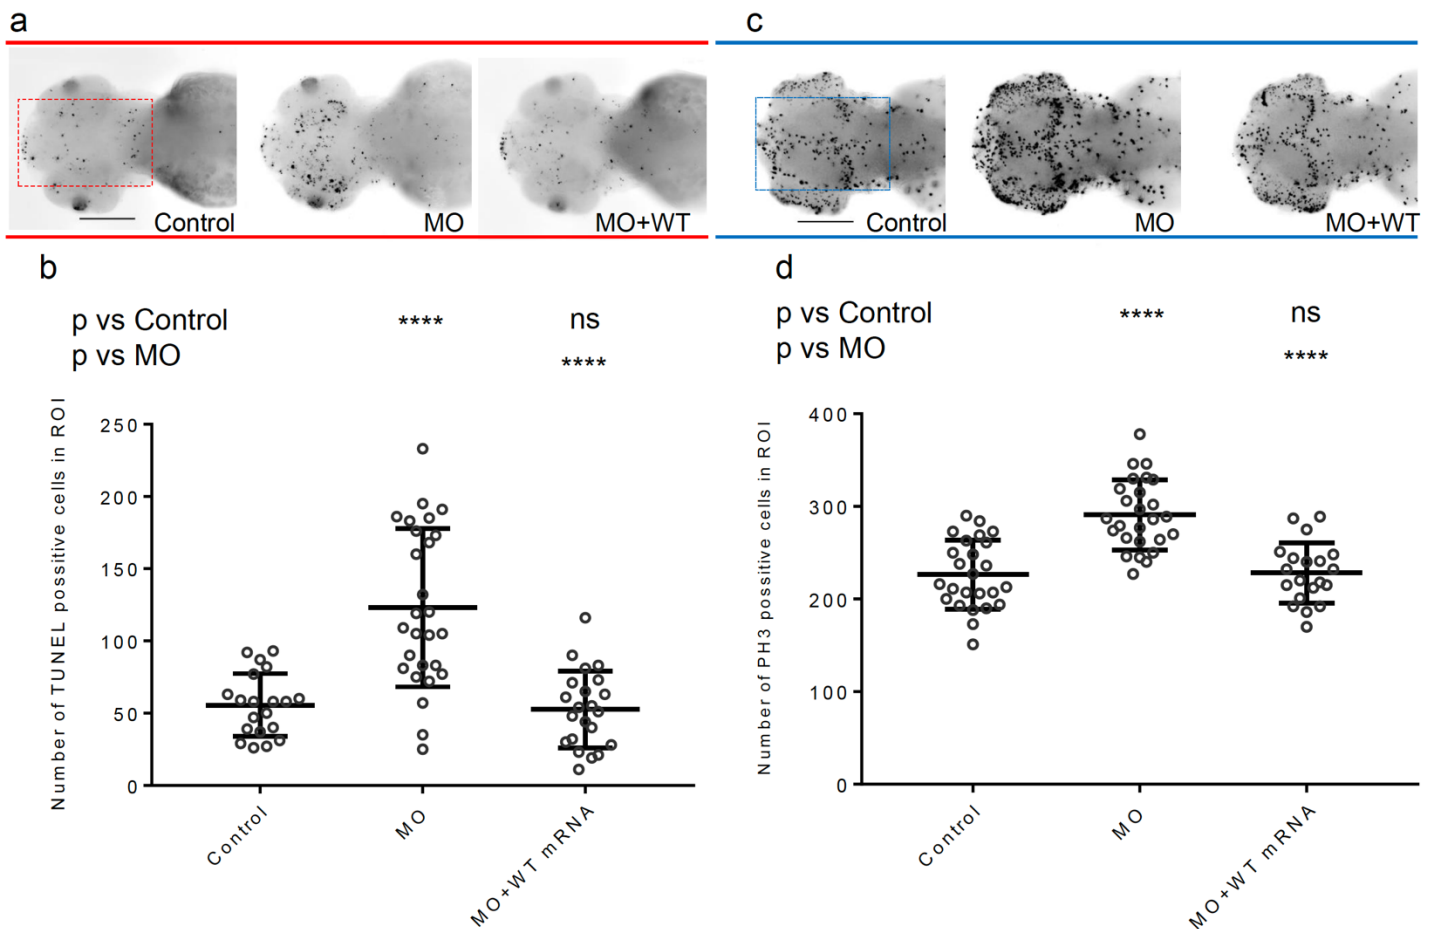

### Supplementary Figure 17. *fam50a* suppression in zebrafish results in apoptosis and altered cell cycle progression.

a) Representative dorsal views of wholemount zebrafish heads stained with terminal deoxynucleotidyl transferase dUTP nick end labeling (TUNEL) show enrichment of apoptotic cells in morphants compared to controls; this defect was rescued by co-injection of human WT *FAM50A* mRNA. Scale bar, 200  $\mu$ m, with equivalent sizing across panels. The region of interest (ROI) quantified is indicated with a red dotted rectangle.

b) Dot plot shows the distribution of TUNEL positive cells in the ROI (see a). TUNEL positive cells were quantified and the statistical differences were calculated using an unpaired student's t-test (two-sided); Exact p-values and number of larvae are listed in Supplementary Table 4; \*\*\*\* indicates  $p < 0.0001$ ; ns, not significant; data are presented as mean values  $\pm$  standard deviation.

c) Representative dorsal images of wholemount zebrafish heads marked with phospho-histone H3 (PH3) immunostaining. Scale bar, 200  $\mu$ m, with equivalent sizing across panels. The ROI is highlighted with a blue dotted rectangle.

d) Dot plot showing quantification of PH3 positive cells in ROI. The statistical differences were calculated using an unpaired student's t-test (two-sided); Exact p-values and number of larvae are listed in Supplementary Table 4; \*\*\*\* indicates  $p < 0.0001$ ; ns, not significant; data are presented as mean values  $\pm$  standard deviation.

## Supplementary Figure 18

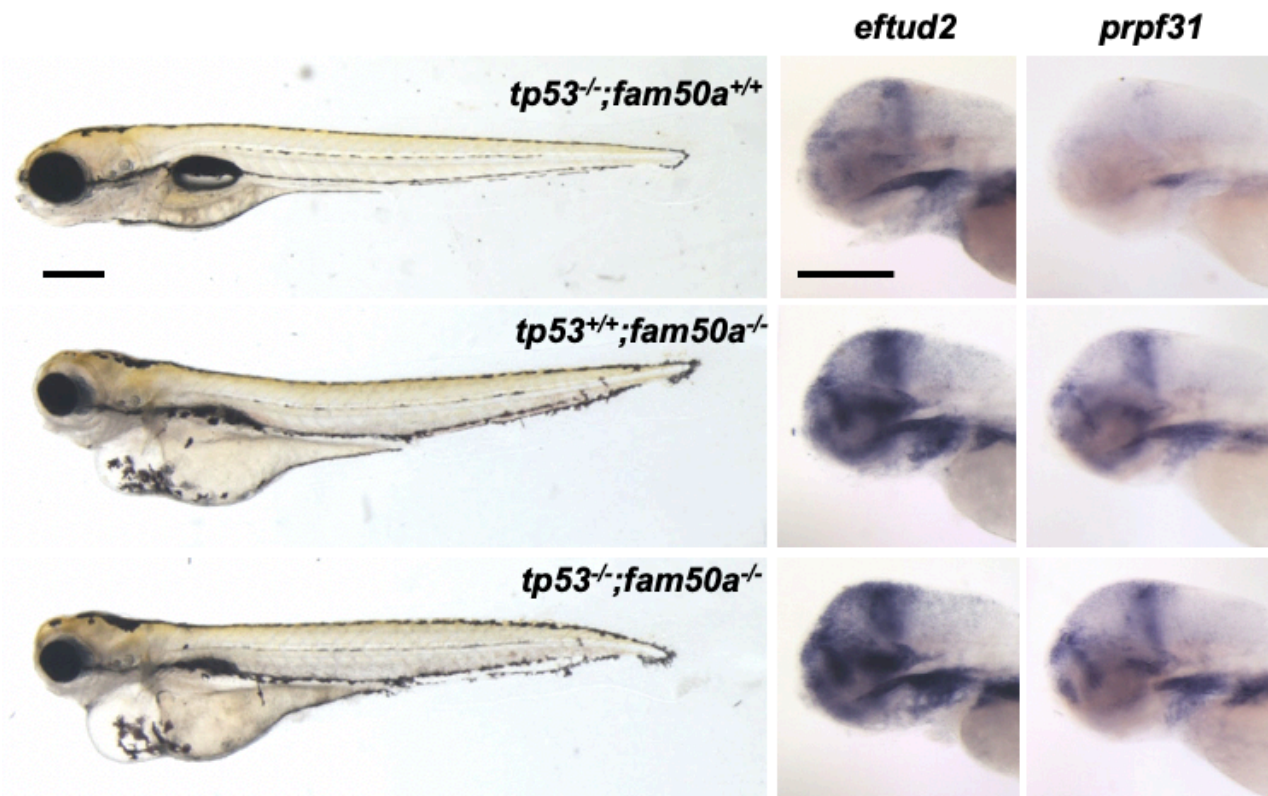

### Supplementary Figure 18. Phenotypic analysis of *fam50a* KO zebrafish in a *p53* (*tp53* in zebrafish) KO background.

Similar phenotypes were observed between *fam50a* single KO zebrafish and *fam50a/tp53* double KO zebrafish at 5 dpf, n=182, repeated six times, with similar results. As representative molecular markers, *eftud2* and *prpf31* expression were examined in *fam50a* single KO zebrafish and *fam50a/tp53* double KO zebrafish at 3 dpf. *eftud2*, n=32, experiment repeated two times; *prpf31*, n=32, experiment performed once; all animals assessed showed similar results within each genotype. Scale bars; 200  $\mu$ m, with equivalent sizing across panels.

# Supplementary Figure 19

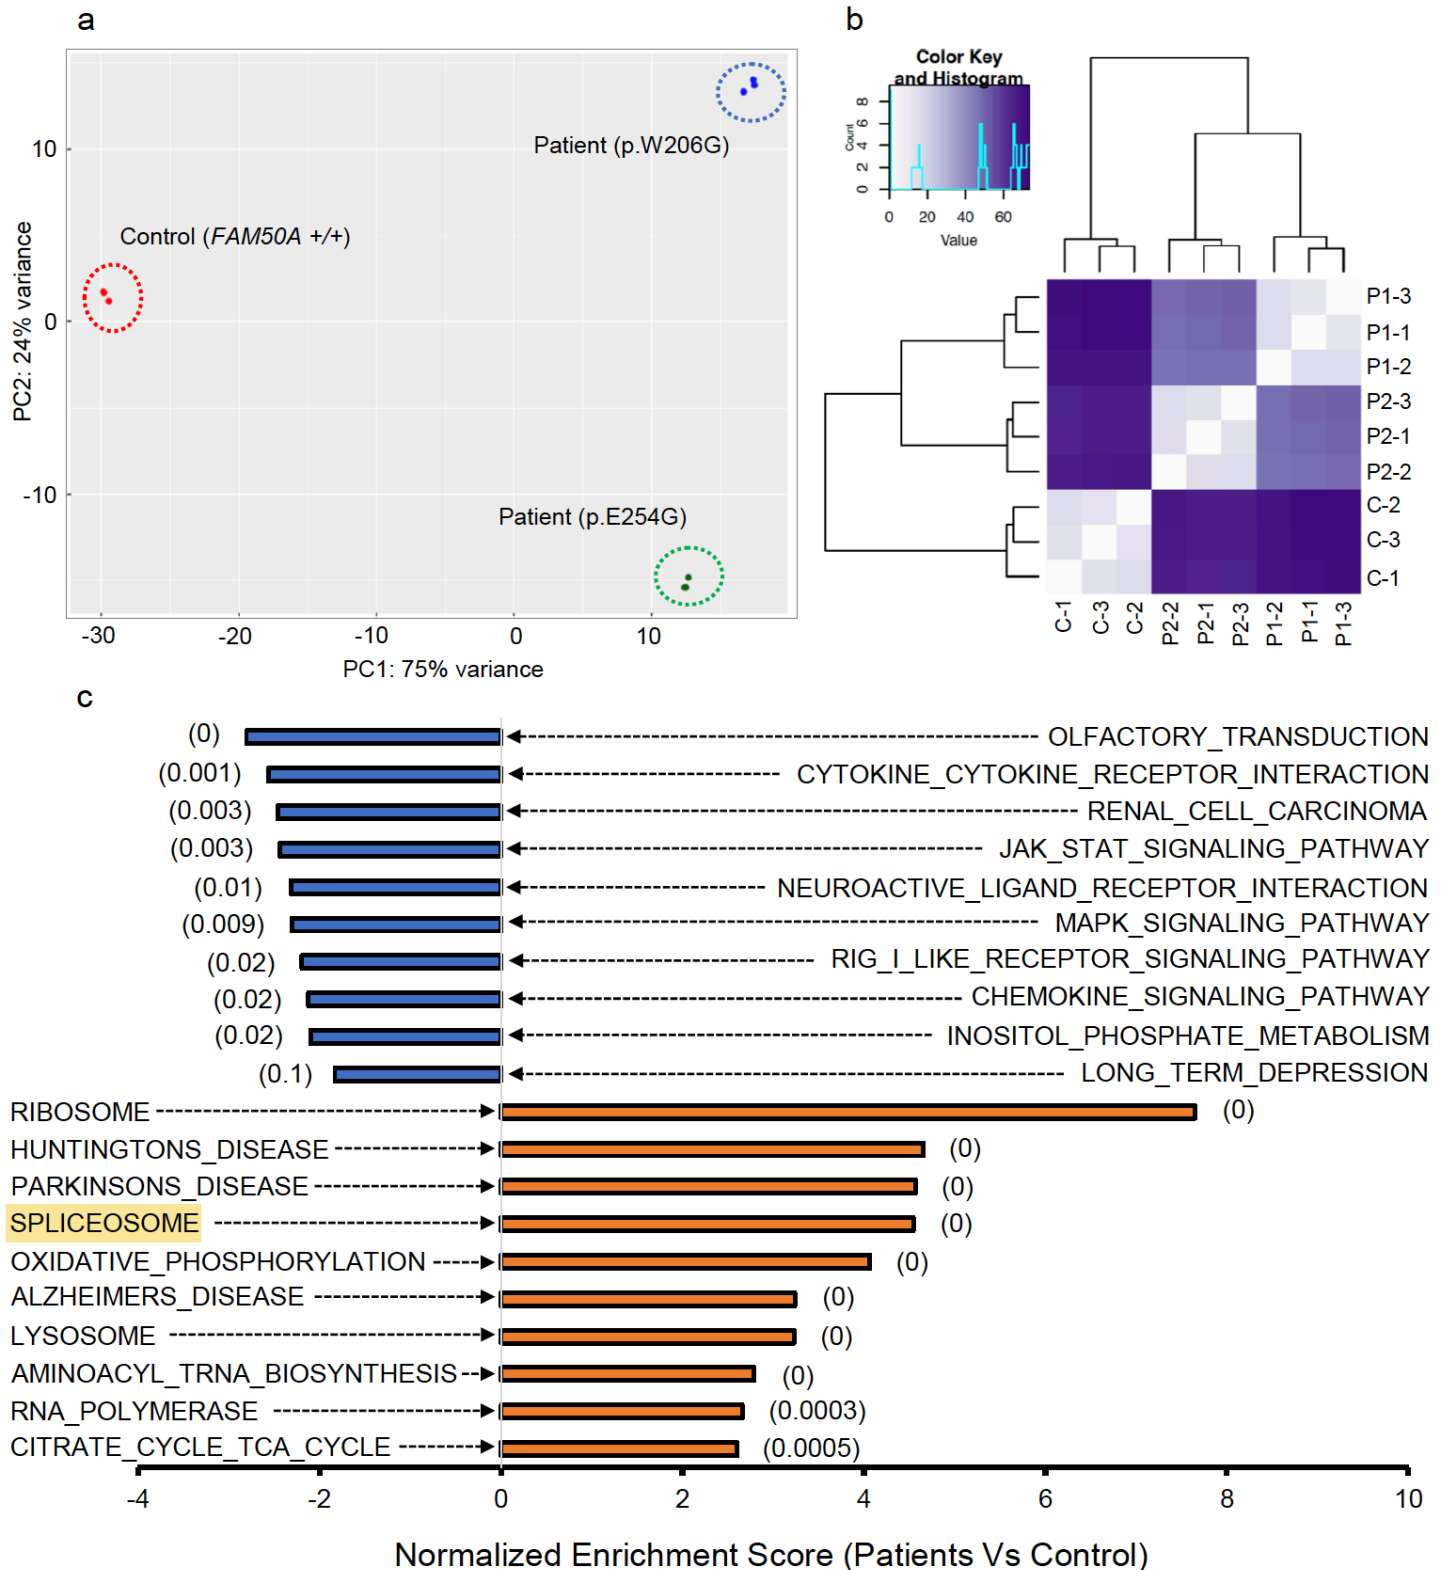

### **Supplementary Figure 19. RNA-seq data generated from FAM50A patient lymphocyte cell lines.**

RNA-seq data from human lymphocyte cell line show alteration of overlapping functional groups compared to transcriptomics data generated on *fam50a* KO zebrafish.

- a) Principal component analysis demonstrates independent clustering of *FAM50A* cases and male control sample of European origin. Samples from control (red circles) and affected individuals (green or blue circles) are separated on PC1 (X-axis), which explains 75% of the variance in the dataset.
- b) Clustered heat map data generated on human lymphoblast cell transcriptomes. A correlation among *FAM50A* patients and control samples is shown using differential expression profiles. The color scale indicates the degree of correlation: white, high correlation; indigo, low correlation, as shown in the color key.
- c) KEGG pathway enrichment analysis using normalized enrichment score for *FAM50A* cases vs control. The top ten significantly dysregulated pathways are plotted along the x-axis both for depleted and augmented gene sets. Down-regulated gene sets, orange; upregulated gene sets, blue. Spliceosome in the upregulated pathway is highlighted in yellow. Statistical differences were calculated using a Kolmogorov-Smirnov test; P-values (FDR corrected) are indicated in parentheses. See NCBI Gene Expression Omnibus under accession number GEO: GSE145710 for source data.

## Supplementary Tables

**Supplementary Table 1. Bioinformatic analyses of patient-derived missense mutations in *FAM50A***

| In silico tool / database | p.Trp206Gly              | p.Glu254Gly               | p.Asp255Gly               | p.Asp255Asn               | p.Arg273Trp               |
|---------------------------|--------------------------|---------------------------|---------------------------|---------------------------|---------------------------|
| iP Tree                   | Negative, Destabilizing  | Negative, Destabilizing   | Negative, Destabilizing   | Negative, Destabilizing   | Negative, Destabilizing   |
| SIFT                      | Damaging                 | Tolerated                 | Tolerated                 | Tolerated                 | Damaging                  |
| Mutation Taster           | Disease causing          | Disease causing           | Disease causing           | Disease causing           | Disease causing           |
| I-Mutant                  | Decreased stability      | Decreased stability       | Decreased stability       | Decreased stability       | Decreased stability       |
| PolyPhen                  | Probably damaging        | Probably damaging         | Probably damaging         | Probably damaging         | Probably damaging         |
| Consurf                   | Highly conserved, buried | Highly conserved, exposed | Highly conserved, exposed | Highly conserved, exposed | Highly conserved, exposed |
| CADD                      | 29                       | 33                        | 19                        | 32                        | 33                        |
| ExAC                      | Not found                | Not found                 | Not found                 | Not found                 | Not found                 |
| gnomAD                    | Not found                | Not found                 | Not found                 | Not found                 | Not found                 |

iP Tree: <http://203.64.84.190:8080/IPTREEr/iptree.htm>

SIFT: <https://sift.bii.a-star.edu.sg/>

Mutation Taster: <http://www.mutationtaster.org/>

I-Mutant: <http://gpcr2.biocomp.unibo.it/cgi/predictors/I-Mutant3.0/I-Mutant3.0.cgi>

PolyPhen: <http://genetics.bwh.harvard.edu/pph2/>

Consurf: <http://consurf.tau.ac.il/2016/>

CADD: <https://cadd.gs.washington.edu/>

ExAC: <http://exac.broadinstitute.org/>

gnomAD: <https://gnomad.broadinstitute.org/>

**Supplementary Table 2. Predicted binding free energy changes in the context of FAM50A missense variants**

| <i>In silico</i> tool | p.Trp206Gly | p.Glu254Gly | p.Asp255Gly | p.Asp255Asn | p.Arg273Trp |
|-----------------------|-------------|-------------|-------------|-------------|-------------|
| mCSM                  | -1.88       | -1.06       | -0.25       | -0.92       | -0.62       |
| SDM                   | -4.46       | -2.40       | 2.76        | 0.48        | -0.20       |
| DUET                  | -1.75       | -1.32       | -0.07       | -0.89       | -0.69       |
| SAAFEC                | 0.72        | 8.15        | 2.29        | 1.46        | 1.60        |
| FOLDX                 | 0.70        | -1.70       | -4.20       | -1.07       | 0.90        |

$\Delta\Delta G > 0$  indicates that mutations stabilize the protein. Energy changes are given in kcal/mol.  
Related to Supplementary Figure 2.

mCSM: <http://biosig.unimelb.edu.au/mcsm/>

SDM: <http://marid.bioc.cam.ac.uk/sdm2/>

DUET: <http://biosig.unimelb.edu.au/duet/>

SAAFEC: <http://compbio.clemson.edu/SAAFEC/>

FOLDX: <http://foldxsuite.crg.eu/>



**Supplementary Table 3. List of primer sequences.**

| Gene/Primer name                                                        | Primer  | Nucleotide sequence (5' to 3') |
|-------------------------------------------------------------------------|---------|--------------------------------|
| Primer sequences used for wholemount RNA <i>in situ</i> probe synthesis |         |                                |
| <i>fam50a</i>                                                           | forward | AGAACCCAGACGTGGACACC           |
| <i>fam50a</i>                                                           | reverse | AGTGTCTGCTGCCCAAGGTC           |
| <i>cdkn1a</i>                                                           | forward | GCGATCTGGAGGACGCATCG           |
| <i>cdkn1a</i>                                                           | reverse | GCTACGTTTTGTGCAATAAGGCA        |
| <i>mdm2</i>                                                             | forward | GAAACACACTCCAAGTGGGA           |
| <i>mdm2</i>                                                             | reverse | TCAATACAGCACCTCACAAGC          |
| <i>aaas</i>                                                             | forward | TTAGGGCTTCCGTCAGTCTG           |
| <i>aaas</i>                                                             | reverse | GGAGGAAGACCATCTCAGCA           |
| <i>eftud2</i>                                                           | forward | CTTTGTGGAGGTTCAAGCACC          |
| <i>eftud2</i>                                                           | reverse | GACACTAGACTGCAAGGGGA           |
| <i>gss</i>                                                              | forward | CAGAGCTGGGAGGTGCGTTTGAT        |
| <i>gss</i>                                                              | reverse | CCCGATGTCAGTCATACGCGT          |
| <i>huwe1</i>                                                            | forward | GGGCTTTTATGAGATCATCCCCA        |
| <i>huwe1</i>                                                            | reverse | GTTCCGGTGTGTCATGAGAGGCT        |
| <i>mettl16</i>                                                          | forward | CGCCCTGTAAGAAGCGTAAGCT         |
| <i>mettl16</i>                                                          | reverse | TCGGTTTTCCAGCATTGTGG           |
| <i>ice1</i>                                                             | forward | TTTCCAAAAGCATGATCGCCA          |
| <i>ice1</i>                                                             | reverse | ACTGTAACCGATGGGCAGAG           |
| <i>prpf3</i>                                                            | forward | CCAGCTGTACCTCACTGGCA           |
| <i>prpf3</i>                                                            | reverse | CAACAATGCCTGCCGTACAT           |
| <i>edar</i>                                                             | forward | TGCTGTTCTGGTCAGCTCAT           |
| <i>edar</i>                                                             | reverse | TCTCGTCTCTTTCAGCCCG            |
| <i>prpf4</i>                                                            | forward | CACTCATGGCGACTTTGGGA           |
| <i>prpf4</i>                                                            | reverse | AACGCCCTGTACATCAAGACCA         |
| <i>snmp200</i>                                                          | forward | GCTCTCGTATGAAGTGGTTGAC         |
| <i>snmp200</i>                                                          | reverse | TCCTGTGGATTCACTACGCA           |
| <i>prpf6</i>                                                            | forward | CGCCTCAAGAATCCACAAAGC          |
| <i>prpf6</i>                                                            | reverse | ACAACGGAGACAACCACTCC           |
| <i>snapc4</i>                                                           | forward | ATGGGAAAGGTGGAATCCCG           |
| <i>snapc4</i>                                                           | reverse | CCCTTAACTCCACAGAGTGC           |
| <i>prpf8</i>                                                            | forward | AAGGAAATGGAGCCTCTTGG           |
| <i>prpf8</i>                                                            | reverse | ACAATGTGCTTTCAGACTTGTGC        |
| <i>snrpe</i>                                                            | forward | TGCGTCATTCTGTTCCGGA            |
| <i>snrpe</i>                                                            | reverse | TTGGACACACTCTGCAGCAACG         |
| <i>prpf31</i>                                                           | forward | GAGAGCGCAGATGGCAAGGTTGG        |
| <i>prpf31</i>                                                           | reverse | ATGTCACCGTCCCCACACAAGTC        |
| <i>txnl4a</i>                                                           | forward | CGCCAAATTTAGCATACGAGACC        |
| <i>txnl4a</i>                                                           | reverse | AGTCTTTAGGGGACACCACAA          |
| <i>sf3b4</i>                                                            | forward | TGCTTTCCACCTGTTCCCTC           |
| <i>sf3b4</i>                                                            | reverse | TTGGTCTTCACATGGGGGTT           |
| <i>EIF4A3</i>                                                           | forward | CTGGTGTGGATGAAGCCGA            |
| <i>EIF4A3</i>                                                           | reverse | ATGATGAGGGAAACCTGCGA           |
| <i>vwa7</i>                                                             | forward | GGCAGAAGATTCACCAGACTC          |
| <i>vwa7</i>                                                             | reverse | AAGACAGACGCTCCAGCACAT          |
| <i>eda</i>                                                              | forward | TCTCGATCCACCAGAGAGTG           |
| <i>eda</i>                                                              | reverse | AGCGTAAGAACGGAGTTTTGTC         |
| Primer sequences used for FAM50A human construct sequencing             |         |                                |

|                                                                                          |            |                                  |
|------------------------------------------------------------------------------------------|------------|----------------------------------|
| FAM50A Ex1 seq                                                                           | forward    | ATGGCTCAATACAAGGGCGC             |
| FAM50A Ex4 seq                                                                           | forward    | AAGCCAAGCGGAAGATCTCC             |
| FAM50A Ex8 seq                                                                           | forward    | CGCTCGAGATCCTTCGGAAA             |
| Primer sequences used for site-directed mutagenesis                                      |            |                                  |
| FAM50A p.A137V F                                                                         | forward    | AGGAGGAAGAGAGGTGGCCATGTATGAGGA   |
| FAM50A p.A137V R                                                                         | reverse    | TCCTCATACATGGCCACCTCCTCTTCCTCCT  |
| FAM50A p.E143K F                                                                         | forward    | GCCATGTATGAGGAGAAGATGGAAAGGGAAG  |
| FAM50A p.E143K R                                                                         | reverse    | CTTCCCTTTCCATCTTCTCCTCATACATGGC  |
| FAM50A p.W206G F                                                                         | forward    | ATCACCTTCAGCTACGGGGATGGCTCTGGGC  |
| FAM50A p.W206G R                                                                         | reverse    | GCCCAGAGCCATCCCCGTAGCTGAAGGTGAT  |
| FAM50A p.E254G F                                                                         | forward    | TCATGTACATCAAGGGGGACTTGATCATCCC  |
| FAM50A p.E254G R                                                                         | reverse    | GGGATGATCAAGTCCCCCTTGATGTACATGA  |
| FAM50A p.D255G F                                                                         | forward    | ATGTACATCAAGGAGGGCTTGATCATCCCTC  |
| FAM50A p.D255G R                                                                         | reverse    | GAGGGATGATCAAGCCCTCCTTGATGTACAT  |
| FAM50A p.D255N F                                                                         | forward    | ATGTACATCAAGGAGAAGCTTGATCATCCCTC |
| FAM50A p.D255N R                                                                         | reverse    | GAGGGATGATCAAGTCTCCTTGATGTACAT   |
| FAM50A p.R273W F                                                                         | forward    | ATCGTCACCAAGGCATGGGGGAAGAGTGGAC  |
| FAM50A p.R273W R                                                                         | reverse    | GTCCACTCTTCCCCCATGCCTTGGTGACGAT  |
| Primer sequences used for <i>FAM50A</i> tissue expression analysis                       |            |                                  |
| cDNA-F                                                                                   | forward    | ATGGCTCAATACAAGGGCGCCGCG         |
| cDNA-R                                                                                   | reverse    | GCGGATCGTGTACTTGTCCCCTTCTT       |
| B-Actin-RT-F                                                                             | forward    | ACCTTCTACAATGAGCTGCG             |
| B-Actin-RT-R                                                                             | reverse    | CCTGGATAGCAACGTACATGG            |
| Primer sequences used for subcellular localization of tagged WT and mutant FAM50A        |            |                                  |
| FAM50A-F1                                                                                | forward    | CACCATGGCTCAATACAAGGGCGCCGCG     |
| FAM50A-R1                                                                                | reverse    | GCGGATCGTGTACTTGTCCCCTTCTT       |
| T7-F                                                                                     | forward    | TAATACGACTCACTATAGGG             |
| BGH-F                                                                                    | reverse    | TAGAAAGGCACAGTCGAGG              |
| Primer sequences used for generation of <i>fam50a</i> CRISPR knockout zebrafish model    |            |                                  |
| sgRNA1-F                                                                                 | forward    | AGAAAGGTTTGGAAACAGCTTT           |
| sgRNA2-R                                                                                 | reverse    | ACATTAGAACCCATCCGACT             |
| sgRNA-seq-F                                                                              | forward    | GTTTCAGGAAGAGGAAAATCGCT          |
| sgRNA-seq-R                                                                              | reverse    | CGACTTATTTGCACATGCAGTG           |
| KO-seq-F                                                                                 | forward    | TTCAGCTACTGGGATGGCTC             |
| KO-seq-R                                                                                 | reverse    | CAACAATATGGCATTITGGGTGC          |
| Primer sequences used for transient suppression of <i>fam50a</i> in zebrafish            |            |                                  |
| sb-MO                                                                                    | morpholino | AGTAAAATCCCGTACATATCTCCTC        |
| MO-seqRT-F                                                                               | forward    | AACAGAAGATCGCAGAGGACA            |
| MO-seqRT-R                                                                               | reverse    | GAGAAACTGCTGGATTGTGTTG           |
| Primer used for sequence confirmation of <i>EFTUD2</i> and <i>DDX41</i> Co-IP constructs |            |                                  |
| EFTUD2-F1                                                                                | forward    | ACCGACTTATATGATGAGTTTGGGA        |
| EFTUD2-F2                                                                                | forward    | CTCAGCCTCTCACAGAACCC             |
| EFTUD2-F3                                                                                | forward    | GGCTGATCCTGGAGCTGAAG             |
| EFTUD2-F4                                                                                | forward    | TTGGCGAGTTCACAGGCTTT             |
| EFTUD2-F5                                                                                | forward    | AGATTGCTGTGGAGCCAGTC             |
| EFTUD2-F6                                                                                | forward    | TCTGAGGTGGACAAGGCTCT             |
| EFTUD2-F7                                                                                | forward    | CTGGCCCGGAATTCATGAT              |
| EFTUD2-R1                                                                                | reverse    | CCAGGGTGGTCATCGTCATG             |
| DDX41-F1                                                                                 | forward    | GAACCCGAACGGAAGCGG               |
| DDX41-F2                                                                                 | forward    | CTCAGTCCAACGTCAGCCTC             |
| DDX41-F3                                                                                 | forward    | TACCTTCTCAAAGCGCGAG              |

|          |         |                      |
|----------|---------|----------------------|
| DDX41-F4 | forward | GCCAAGATGGTGTACCTGCT |
| DDX41-F5 | forward | CCTGGGTCATCGGATCACTG |
| DDX41-R1 | reverse | GGCACATAGGGCACGTAGTC |

**Supplementary Table 4. Statistical differences in stable and transient *fam50a* zebrafish models.**

|                                                                                                            | N  | Mean   | SD    | SEM   | P vs control | P vs FAM50A-WT mRNA | P vs morphants | P vs WT-rescue | Interpretation* |
|------------------------------------------------------------------------------------------------------------|----|--------|-------|-------|--------------|---------------------|----------------|----------------|-----------------|
| <i>fam50a</i> KO craniofacial phenotyping, related to Figure 3b and Supplementary Figure 10a               |    |        |       |       |              |                     |                |                |                 |
| WT                                                                                                         | 20 | 96.89  | 12.03 | 2.69  |              |                     |                |                |                 |
| <i>fam50a</i> <sup>+/-</sup>                                                                               | 37 | 96.35  | 15.13 | 2.49  | 0.8905       |                     |                |                |                 |
| <i>fam50a</i> <sup>-/-</sup>                                                                               | 24 | 138.44 | 14.39 | 2.94  | 5.2742E-13   |                     |                |                |                 |
| Morpholino dose curve (craniofacial), related to Supplementary Figure 11d                                  |    |        |       |       |              |                     |                |                |                 |
| Control                                                                                                    | 56 | 87.47  | 5.28  | 0.70  |              |                     |                |                |                 |
| MO 3ng                                                                                                     | 36 | 88.73  | 7.29  | 1.21  | 0.3395       |                     |                |                |                 |
| MO 6ng                                                                                                     | 48 | 115.54 | 8.31  | 1.20  | 1.5394E-38   |                     |                |                |                 |
| MO 9ng                                                                                                     | 41 | 125.77 | 15.41 | 2.40  | 4.3164E-31   |                     |                |                |                 |
| Variants tested (craniofacial), related to Figure 3c and Supplementary Figure 10b                          |    |        |       |       |              |                     |                |                |                 |
| Control                                                                                                    | 40 | 87.90  | 5.46  | 0.86  |              |                     | 6.1110E-16     | 0.1377         |                 |
| MO 5ng                                                                                                     | 45 | 103.84 | 8.64  | 1.28  | 6.1110E-16   |                     |                | 2.3657E-12     |                 |
| MO+WT                                                                                                      | 39 | 89.93  | 6.49  | 1.04  | 0.1377       |                     | 2.3657E-12     |                |                 |
| MO+p.A137V                                                                                                 | 36 | 89.34  | 6.16  | 1.03  | 0.2851       |                     | 9.8773E-13     | 0.6896         | Benign          |
| MO+p.E143K                                                                                                 | 49 | 92.43  | 6.16  | 0.88  | 0.0005       |                     | 5.6586E-11     | 0.0680         | Benign          |
| MO+p.D255G                                                                                                 | 46 | 103.51 | 7.77  | 1.15  | 3.3923E-17   |                     | 0.8473         | 3.2926E-13     | Pathogenic      |
| Variants tested (craniofacial), related to Figure 3c and Supplementary Figure 10c                          |    |        |       |       |              |                     |                |                |                 |
| Control                                                                                                    | 61 | 90.20  | 5.34  | 0.68  |              |                     | 6.1359E-21     | 0.0002         |                 |
| MO 5ng                                                                                                     | 78 | 111.43 | 7.16  | 0.81  | 6.1359E-21   |                     |                | 1.8623E-21     |                 |
| MO+WT                                                                                                      | 43 | 95.11  | 7.69  | 1.17  | 0.0002       |                     | 1.8623E-21     |                |                 |
| MO+p.D255N                                                                                                 | 66 | 106.23 | 8.94  | 1.10  | 7.1448E-23   |                     | 0.0002         | 1.0591E-09     | Pathogenic      |
| MO+p.R273W                                                                                                 | 69 | 100.49 | 7.60  | 0.91  | 7.1830E-15   |                     | 1.3212E-15     | 0.0004         | Pathogenic      |
| Variants tested (craniofacial), related to Figure 3c and Supplementary Figure 10d                          |    |        |       |       |              |                     |                |                |                 |
| Control                                                                                                    | 35 | 92.22  | 5.92  | 1.01  |              |                     | 3.4646E-29     | 0.0615         |                 |
| MO 5ng                                                                                                     | 41 | 124.05 | 7.14  | 1.11  | 3.4646E-29   |                     |                | 1.6332E-26     |                 |
| MO+WT                                                                                                      | 44 | 99.16  | 7.48  | 1.12  |              |                     | 1.6332E-26     |                |                 |
| MO+p.W206G                                                                                                 | 32 | 104.11 | 5.78  | 1.02  | 6.5824E-07   |                     | 3.4999E-20     | 0.0025         | Pathogenic      |
| Variants tested (craniofacial), related to Figure 3c and Supplementary Figure 10e                          |    |        |       |       |              |                     |                |                |                 |
| Control                                                                                                    | 38 | 90.14  | 6.76  | 1.09  |              |                     | 2.4686E-30     | 0.0502         |                 |
| MO 5ng                                                                                                     | 44 | 125.24 | 10.01 | 1.51  | 2.4686E-30   |                     |                | 5.5137E-26     |                 |
| MO+WT                                                                                                      | 33 | 93.26  | 6.38  | 1.11  | 0.0502       |                     | 5.5137E-26     |                |                 |
| MO+p.E254G                                                                                                 | 36 | 100.25 | 8.49  | 1.41  | 2.6495E-07   |                     | 3.4505E-19     | 0.0003         | Pathogenic      |
| Overexpression (craniofacial), related to Supplementary Figure 12 (left)                                   |    |        |       |       |              |                     |                |                |                 |
| Control                                                                                                    | 44 | 87.21  | 7.05  | 1.06  |              | 0.0571              |                |                |                 |
| WT                                                                                                         | 37 | 90.01  | 5.79  | 0.95  | 0.0571       |                     |                |                |                 |
| p.A137V                                                                                                    | 38 | 90.17  | 5.73  | 0.93  | 0.042        | 0.9043              |                |                |                 |
| p.E143K                                                                                                    | 42 | 91.13  | 5.87  | 0.90  | 0.0065       | 0.3996              |                |                |                 |
| p.D255G                                                                                                    | 53 | 90     | 7.45  | 1.02  | 0.0633       | 0.9913              |                |                |                 |
| p.D255N                                                                                                    | 39 | 90.28  | 5.89  | 0.94  | 0.0356       | 0.8432              |                |                |                 |
| Overexpression (craniofacial), related to Supplementary Figure 12 (right)                                  |    |        |       |       |              |                     |                |                |                 |
| Control                                                                                                    | 50 | 88.51  | 4.75  | 0.67  |              | 0.0049              |                |                |                 |
| WT                                                                                                         | 42 | 91.36  | 4.64  | 0.72  | 0.0049       |                     |                |                |                 |
| p.W206G                                                                                                    | 48 | 92.78  | 5.10  | 0.74  | 4.4193E-05   | 0.1728              |                |                |                 |
| p.E254G                                                                                                    | 36 | 93.86  | 4.28  | 0.71  | 7.2727E-07   | 0.0163              |                |                |                 |
| p.R273W                                                                                                    | 49 | 93.08  | 4.71  | 0.67  | 5.7480E-06   | 0.0825              |                |                |                 |
| Apoptosis phenotyping in <i>fam50a</i> transient knockdown zebrafish, related to Supplementary Figure 17b  |    |        |       |       |              |                     |                |                |                 |
| Control                                                                                                    | 20 | 55.65  | 21.7  | 4.85  |              |                     | 4.8236E-06     | 0.6953         |                 |
| MO 5ng                                                                                                     | 27 | 123.04 | 54.81 | 10.55 | 4.8236E-06   |                     |                | 1.4718E-06     |                 |
| MO+WT                                                                                                      | 22 | 52.68  | 26.52 | 5.66  | 0.6953       |                     | 1.4718E-06     |                |                 |
| Cell cycle phenotyping in <i>fam50a</i> transient knockdown zebrafish, related to Supplementary Figure 17d |    |        |       |       |              |                     |                |                |                 |
| Control                                                                                                    | 25 | 226.44 | 37.19 | 7.44  |              |                     | 1.4977E-07     | 0.8833         |                 |
| MO 5ng                                                                                                     | 26 | 290.81 | 37.82 | 7.42  | 1.4977E-07   |                     |                | 4.3573E-07     |                 |
| MO+WT                                                                                                      | 20 | 228    | 32.56 | 7.28  | 0.8833       |                     | 4.3573E-07     |                |                 |

P-values determined with an unpaired student's t-test (two-sided).

**Supplementary Table 5. DAVID analysis showing enriched functional groups of genes with altered mRNA splicing in *fam50a*<sup>-/-</sup> vs. control zebrafish heads at 2 dpf. Related to Figure 4.**

| GO term*                              | Description                                                                    | Fold enrichment** | P-value‡  | Bonferroni^ | Genes                                                                                                                                                                                                                                                                                                                                                                                                         |
|---------------------------------------|--------------------------------------------------------------------------------|-------------------|-----------|-------------|---------------------------------------------------------------------------------------------------------------------------------------------------------------------------------------------------------------------------------------------------------------------------------------------------------------------------------------------------------------------------------------------------------------|
| <b>Alternative 3' splicing events</b> |                                                                                |                   |           |             |                                                                                                                                                                                                                                                                                                                                                                                                               |
| GO:0005634                            | nucleus                                                                        | 1.95              | 2.20E-07  | 2.25E-05    | qkia, kat6b, kdm3b, eya3, atf7ip, adrm1, prpf39, zc3h18, mier1a, ebf3a, u2af2b, ilf3b, ccn1a, pou2f1b, sim1b, tcf7l2, arnt2, ep300b, nav3, smarcc1b, tcf3a, elf2a, eya4, rnf111, chd4a, rps6ka3a, stat5b, phf20l1, foxp1a, mdm4, arnt, chd1, otud7b, dot1l, hdac9b, mcmbp, tnfrsf1b, psen1, rtfdc1, hmga1a, mvp, rbm39a, rbmx, tdg.2, foxp1b, ggnbp2, akap8l, smg1, ep300a, apex1, mef2aa, tfdp2, etv5a, nfyc |
| GO:0003677                            | DNA binding                                                                    | 2.58              | 1.125E-06 | 0.00018     | chd4a, kat6b, stat5b, hipk2, foxp1a, pogzb, si:ch211-266o15.1, arnt, chd1, otud7b, csde1, ZNF335, ybx1, hmga1a, zfand5a, mier1a, ebf3a, foxp1b, ilf3b, pou2f1b, lef1, sim1b, rfc4, zgc:77486, arnt2, akap8l, smarcc1b, apex1, mef2aa, tfdp2, elf2a, etv5a                                                                                                                                                     |
| GO:0003723                            | RNA binding                                                                    | 3.68              | 1.67E-06  | 0.00026     | qkia, elavl3, ybx1, ewsr1a, ankhd1, rbm17, pcbp3, rbm39a, hug, u2af2b, rbmx, rpl22l1, ilf3b, elavl4, cirrbp, ilf3a, igf2bp2a, eif4g1a, apex1, ewsr1b                                                                                                                                                                                                                                                          |
| GO:0006355                            | regulation of transcription, DNA-templated                                     | 2.53              | 6.06E-06  | 0.0024      | chd4a, kat6b, stat5b, phf20l1, foxp1a, kdm3b, eya3, arnt, csde1, atf7ip, sap130a, hdac9b, ybx1, hmga1a, ebf3a, foxp1b, ccn1a, ilf3b, pou2f1b, sim1b, arnt2, ep300a, ep300b, mef2aa, tfdp2, elf2a, etv5a, eya4, nfyc                                                                                                                                                                                           |
| GO:0003676                            | nucleic acid binding                                                           | 2.20              | 7.87E-05  | 0.012       | qkia, elavl3, chd4a, ankhd1, rbm17, pcbp3, si:dkey-217d24.6, phf20l1, hnrnpaba, foxp1a, zcchc8, pogzb, csde1, igf2bp2a, rbm39a, ZNF335, celf5a, si:dkey-205h23.2, ybx1, ewsr1a, rbm39a, hug, rbmx, u2af2b, foxp1b, elavl4, cirrbp, tardbp1, ewsr1b                                                                                                                                                            |
| GO:0005667                            | transcription factor complex                                                   | 7.32              | 0.0001    | 0.01        | lef1, sim1b, eya3, tcf7l2, arnt2, arnt, tcf3a, tfdp2                                                                                                                                                                                                                                                                                                                                                          |
| GO:0007420                            | brain development                                                              | 5.04              | 0.001     | 0.33        | arnt2, psen1, kdm6al, mib1, fam57ba, mvp, ldlr, tnfrsf1b                                                                                                                                                                                                                                                                                                                                                      |
| GO:0006509                            | membrane protein ectodomain proteolysis                                        | 34.01             | 0.0031    | 0.71        | adam10a, psen1, rbmx                                                                                                                                                                                                                                                                                                                                                                                          |
| GO:0006351                            | transcription, DNA-templated                                                   | 2.28              | 0.0039    | 0.79        | stat5b, ebf3a, rbmx, foxp1b, ilf3b, pou2f1b, foxp1a, sim1b, eya3, arnt2, arnt, atf7ip, hdac9b, mef2aa, tfdp2, eya4                                                                                                                                                                                                                                                                                            |
| GO:0019013                            | viral nucleocapsid                                                             | 10.63             | 0.006     | 0.46        | elavl3, hug, hnrnpaba, elavl4                                                                                                                                                                                                                                                                                                                                                                                 |
| GO:0004402                            | histone acetyltransferase activity                                             | 10.57             | 0.006     | 0.62        | kat6b, ep300a, sap130a, ep300b                                                                                                                                                                                                                                                                                                                                                                                |
| GO:0019012                            | virion                                                                         | 9.98              | 0.0071    | 0.52        | elavl3, hug, hnrnpaba, elavl4                                                                                                                                                                                                                                                                                                                                                                                 |
| GO:0000981                            | RNA polymerase II transcription factor activity, sequence-specific DNA binding | 4.032             | 0.0076    | 0.70        | sim1b, si:ch211-266o15.1, tfdp2, elf2a, etv5a, foxp1b, foxp1a                                                                                                                                                                                                                                                                                                                                                 |
| GO:0006397                            | mRNA processing                                                                | 4.62              | 0.0093    | 0.97        | qkia, srrm1, rbm39a, rbmx, u2af2b, prpf39                                                                                                                                                                                                                                                                                                                                                                     |

|            |                                                                                   |       |       |       |                                                                                                                                                                               |
|------------|-----------------------------------------------------------------------------------|-------|-------|-------|-------------------------------------------------------------------------------------------------------------------------------------------------------------------------------|
| dre04520   | Adherens junction                                                                 | 5.62  | 0.01  | 0.39  | lef1, tcf7l2, ep300a, ep300b, vcla                                                                                                                                            |
| dre04916   | Melanogenesis                                                                     | 5.55  | 0.01  | 0.40  | lef1, tcf7l2, ep300a, ep300b, adcy7                                                                                                                                           |
| GO:0060070 | canonical Wnt signaling pathway                                                   | 8.14  | 0.012 | 0.99  | lef1, tcf7l2, psen1, dot1l                                                                                                                                                    |
| GO:0007219 | Notch signaling pathway                                                           | 7.94  | 0.013 | 0.99  | adam10a, psen1, otud7b, mib1                                                                                                                                                  |
| GO:0046983 | protein dimerization activity                                                     | 4.22  | 0.013 | 0.88  | sim1b, arnt2, arnt, tcf3a, usf1, mef2aa                                                                                                                                       |
| GO:0010628 | positive regulation of gene expression                                            | 14.88 | 0.017 | 0.998 | lef1, apex1, mef2aa                                                                                                                                                           |
| dre04512   | ECM-receptor interaction                                                          | 6.78  | 0.019 | 0.60  | thbs1b, hmmr, itgb4, hspg2                                                                                                                                                    |
| GO:0003700 | transcription factor activity, sequence-specific DNA binding                      | 2.10  | 0.019 | 0.95  | stat5b, hmga1a, foxp1b, foxp1a, pou2f1b, sim1b, arnt, arnt2, tcf3a, elf2a, tfdp2, etv5a, nfyc                                                                                 |
| GO:0005794 | Golgi apparatus                                                                   | 2.62  | 0.032 | 0.96  | st6galnac6, psen1, clasp2, nav3, gnptab, rnf144ab, si:ch211-220f16.2, gosr1                                                                                                   |
| GO:0008270 | zinc ion binding                                                                  | 1.64  | 0.032 | 0.99  | rnf111, nup153, kat6b, chd4a, ewsr1a, zfand5a, mib1, phf20l1, zcchc8, zgc:77486, si:ch211-266o15.1, mdm4, otud7b, ep300a, ep300b, micall2a, rnf144ab, ewsr1b, scaf11, rsf1b.1 |
| dre04310   | Wnt signaling pathway                                                             | 3.87  | 0.036 | 0.82  | lef1, tcf7l2, psen1, ep300a, ep300b                                                                                                                                           |
| GO:0021979 | hypothalamus cell differentiation                                                 | 52.91 | 0.037 | 0.99  | lef1, arnt2                                                                                                                                                                   |
| GO:0016576 | histone dephosphorylation                                                         | 52.91 | 0.037 | 0.99  | eya3, eya4                                                                                                                                                                    |
| GO:0048025 | negative regulation of mRNA splicing, via spliceosome                             | 52.91 | 0.037 | 0.99  | ybx1, rbmx                                                                                                                                                                    |
| GO:0007275 | multicellular organism development                                                | 2.19  | 0.038 | 0.99  | qkia, si:ch211-266o15.1, eya3, arnt2, mib1, ccdc85ca, ebf3a, ncl1, rbmx, eya4                                                                                                 |
| GO:0051010 | microtubule plus-end binding                                                      | 51.07 | 0.038 | 0.99  | clasp2, clasp1a                                                                                                                                                               |
| GO:0043515 | kinetochore binding                                                               | 51.07 | 0.038 | 0.99  | cenpe, clasp1a                                                                                                                                                                |
| GO:2001240 | negative regulation of extrinsic apoptotic signaling pathway in absence of ligand | 39.69 | 0.049 | 0.99  | lef1, tcf7l2, psen1, ep300a, ep300b                                                                                                                                           |

**Alternative 5' splicing events**

|                                |                                                     |        |         |      |                                                                                                                                 |
|--------------------------------|-----------------------------------------------------|--------|---------|------|---------------------------------------------------------------------------------------------------------------------------------|
| GO:0003676                     | nucleic acid binding                                | 5.026  | 0.0029  | 0.06 | cpsf6, syncrip, ddx3b, taf15, trnau1apb, celf2                                                                                  |
| GO:0000166                     | nucleotide binding                                  | 3.83   | 0.0096  | 0.18 | cpsf6, syncrip, ddx3b, taf15, trnau1apb, celf2                                                                                  |
| <b>Intron retention events</b> |                                                     |        |         |      |                                                                                                                                 |
| GO:0006412                     | translation                                         | 4.718  | 0.019   | 0.89 | rps2, gfm2, qrsl1, rpl10a, rpl13a                                                                                               |
| GO:0015934                     | large ribosomal subunit                             | 55.478 | 0.034   | 0.86 | rpl10a, rpl13a                                                                                                                  |
| GO:0003723                     | RNA binding                                         | 3.76   | 0.039   | 0.99 | rps2, ythdc1, rae1, rpl10a, parn                                                                                                |
| <b>Exon skipping events</b>    |                                                     |        |         |      |                                                                                                                                 |
| GO:0003723                     | RNA binding                                         | 4.079  | 0.00029 | 0.02 | EIF4BB, PCBP3, RPL9, U2AF2A, SF1, EIF4G1A, U2AF2B, CELF2, PCBP2, HNRPL, RBM4.1                                                  |
| GO:0000166                     | nucleotide binding                                  | 1.98   | 0.008   | 0.51 | SRSF3A, MARK4, U2AF2A, RPS24, NTRK2A, U2AF2B, CELF2, ATP11C, GFM2, EIF4BB, GNAL, HNRNPH3, RPS6KB1B, MYO5B, PAK6B, HNRPL, RBM4.1 |
| GO:0003676                     | nucleic acid binding                                | 2.15   | 0.01    | 0.60 | SRSF3A, PCBP3, U2AF2A, SF1, U2AF2B, CELF2, PCBP2, POGZB, EIF4BB, NPM1B, HNRNPH3, CHD4B, HNRPL, RBM4.1                           |
| GO:0008187                     | poly-pyrimidine tract binding                       | 154.29 | 0.013   | 0.68 | U2AF2A, U2AF2B                                                                                                                  |
| GO:0089701                     | U2AF                                                | 89.33  | 0.022   | 0.75 | U2AF2A, U2AF2B                                                                                                                  |
| GO:0006397                     | mRNA processing                                     | 6.26   | 0.025   | 0.99 | U2AF2A, U2AF2B, CELF2, HNRPL                                                                                                    |
| GO:0030628                     | pre-mRNA 3'-splice site binding                     | 77.15  | 0.025   | 0.90 | U2AF2A, U2AF2B                                                                                                                  |
| GO:0070507                     | regulation of microtubule cytoskeleton organization | 53.72  | 0.036   | 0.99 | TRAF3IP1, ATAT1                                                                                                                 |
| GO:0000243                     | commitment complex                                  | 39.70  | 0.048   | 0.96 | U2AF2A, U2AF2B                                                                                                                  |

\*GO, Gene ontology, <http://geneontology.org/>; dre, KEGG pathway, <https://www.genome.jp/kegg/pathway.html>

\*\* Proportion of genes found over hits found in background (percent genes found from query / percent hits found in background)

‡ DAVID derived p-value (Fisher's exact test)

^Adjusted p-value

**Supplementary Table 6. DAVID analysis showing enriched functional groups of genes with altered mRNA splicing in cases vs. control lymphoblast cell lines. Related to Supplementary Figure 19.**

| GO term*                              | Description                        | Fold enrichment** | P-value <sup>‡</sup> | Bonferroni <sup>^</sup> | Genes                                                                                                                                                                                                                                                                                                                                                                                                                                                                                                                                                             |
|---------------------------------------|------------------------------------|-------------------|----------------------|-------------------------|-------------------------------------------------------------------------------------------------------------------------------------------------------------------------------------------------------------------------------------------------------------------------------------------------------------------------------------------------------------------------------------------------------------------------------------------------------------------------------------------------------------------------------------------------------------------|
| <b>Alternative 3' splicing events</b> |                                    |                   |                      |                         |                                                                                                                                                                                                                                                                                                                                                                                                                                                                                                                                                                   |
| GO:0016020                            | membrane                           | 2.001879          | 3.56E-04             | 0.069347808             | LST1, RPL13, OFD1, CSE1L, CLK3, ATIC, PSMD2, ZNF106, HNRNPC, ACSL4, CLINT1, SLC30A6, CHD4, RHEBL1, FMR1, STRN4, HLA-A, BCL2L12, IL11RA, HLA-DQA1, ELMO2, EIF4G1, VEGFB, PITPNM1, MPHOSPH9, NPC1, ATP13A1, DPM1, PDCD6IP                                                                                                                                                                                                                                                                                                                                           |
| GO:0005654                            | nucleoplasm                        | 1.800144          | 7.54E-04             | 0.141409389             | ING4, DBF4B, LITAF, FAM193B, MKNK2, PPP6R3, TRRAP, HMG5, SF3B2, ISG20, PLAGL1, MPPE1, TRIM66, CSE1L, CLK3, PSMD2, PBRM1, CC2D1B, HNRNPC, CLINT1, CHD4, TRMU, C17ORF49, SMAD7, SREK1, DDX39B, FMR1, BANP, UPF3A, WDR61, MAPK9, RNPC3, HDAC7                                                                                                                                                                                                                                                                                                                        |
| GO:0005515                            | protein binding                    | 1.286617          | 0.001063             | 0.216976217             | DBF4B, RPL13, PHF23, GGT1, ZNF346, OFD1, CLK3, PSMD2, IGFLR1, QKI, INO80E, CLINT1, SIK3, STRN4, FMR1, DDX39B, HLA-A, BANP, TECR, FAM118B, ELMO2, VEGFB, WDR48, EIF4G1, TARBP2, PITPNM1, NPC1, NOP2, MIB2, MAPK9, PDCD6IP, MTRF1L, SEPT6, ABLIM1, ING4, HAX1, LITAF, CEP95, TMEM218, MKNK2, GCSAM, PPP6R3, TRRAP, TJAP1, SF3B2, MPPE1, CSE1L, CEP170, GMPPA, ENO2, CD22, PBRM1, CC2D1B, HNRNPC, C19ORF60, CHD4, RHEBL1, UNC45A, UBXN11, SMAD7, MSH5, SREK1, KIF18B, HDDC3, ZBTB44, NAT9, WSB1, UPF3A, FNBP1, APOL1, WDR61, ZSCAN32, DPM1, SETD6, GGA2, GGA3, HDAC7 |
| GO:0008380                            | RNA splicing                       | 6.496297          | 7.11E-04             | 0.317772043             | SREK1, FMR1, DDX39B, QKI, RNPC3, HNRNPC, SF3B2                                                                                                                                                                                                                                                                                                                                                                                                                                                                                                                    |
| GO:0070971                            | endoplasmic reticulum exit site    | 35.04615          | 0.003146             | 0.470901601             | MPPE1, HLA-A, PDCD6IP                                                                                                                                                                                                                                                                                                                                                                                                                                                                                                                                             |
| GO:0044822                            | poly(A) RNA binding                | 2.080302          | 0.008931             | 0.87297277              | RBM33, RPL13, SREK1, FMR1, DDX39B, HLA-A, ZNF346, HMG5, SF3B2, EIF4G1, NOP2, CLK3, QKI, USP36, ZNF106, HNRNPC                                                                                                                                                                                                                                                                                                                                                                                                                                                     |
| GO:0005794                            | Golgi apparatus                    | 2.287679          | 0.010773             | 0.887864053             | PLAGL1, ARFGAP2, MPHOSPH9, NPC1, MPPE1, LST1, LITAF, TANGO2, HLA-A, TRRAP, GGA2, CLINT1, SLC30A6                                                                                                                                                                                                                                                                                                                                                                                                                                                                  |
| GO:0045727                            | positive regulation of translation | 11.6268           | 0.004799             | 0.924845207             | UPF3A, TARBP2, FMR1, DDX39B                                                                                                                                                                                                                                                                                                                                                                                                                                                                                                                                       |
| hsa00230                              | Purine metabolism                  | 4.158003          | 0.029332             | 0.957392715             | ATIC, HDDC3, DGUOK, GUK1, AMPD3                                                                                                                                                                                                                                                                                                                                                                                                                                                                                                                                   |
| GO:0005737                            | cytoplasm                          | 1.337776          | 0.019026             | 0.979355995             | ABLIM1, ARFGAP2, LST1, DBF4B, LITAF, CEP95, FAM193B, MKNK2, PHF23, GCSAM, PPP6R3, ZNF346, ISG20, MPPE1, CSE1L, CEP170, GMPPA, PHTF1, QKI, ACSL4, CHD4, SIK3, RHEBL1, UBXN11, C17ORF49, SMAD7, DDX39B, STRN4, FMR1, KIF18B, ANKRD13A, TECR, ELMO2, P2RX5, PANK4, EIF4G1, UPF3A, TARBP2, MPHOSPH9, PITPNM1, RPAIN, WDR61, MIB2, SETD6, PDCD6IP, HDAC7                                                                                                                                                                                                               |
| <b>Alternative 5' splicing events</b> |                                    |                   |                      |                         |                                                                                                                                                                                                                                                                                                                                                                                                                                                                                                                                                                   |
| GO:0044822                            | poly(A) RNA binding                | 3.858625          | 8.32E-06             | 0.00121342              | ZC3H14, HMG2, RBM3, MRPS11, HLA-A, CNOT1, DDX5, RPS3, SAFB2, R3HDM1, PPIE, SRSF5, HNRNPH3, CLK3, RPLP0, PLEC                                                                                                                                                                                                                                                                                                                                                                                                                                                      |
| GO:0005634                            | nucleus                            | 1.656845          | 0.001217968          | 0.140255598             | NDUFAF6, HMG3, HMG2, HP1BP3, RBM3, ZNF131, PML, RABGAP1L, CNOT1, MXI1, RPS3, ACTG1, SFSWAP, CLK3, UFM1, ACTR6, RPLP0, PSMC3IP, PQBP1, C7ORF49, CREB3L4, ZC3H14, SDR39U1, ESPL1, DDX5, TACC1, SAFB2, TARBP2, PPIE, SRSF5, HNRNPH3, PARP2                                                                                                                                                                                                                                                                                                                           |
| GO:0003723                            | RNA binding                        | 3.982072          | 0.003464605          | 0.397525924             | PPIE, SFSWAP, SRSF5, HNRNPH3, COA1, RBM3, RNASET2, RPS3                                                                                                                                                                                                                                                                                                                                                                                                                                                                                                           |



|                                |                                                                                                 |             |             |             |                                                                                                                                                                                                                                                                                                                                                                                                                                                                                            |
|--------------------------------|-------------------------------------------------------------------------------------------------|-------------|-------------|-------------|--------------------------------------------------------------------------------------------------------------------------------------------------------------------------------------------------------------------------------------------------------------------------------------------------------------------------------------------------------------------------------------------------------------------------------------------------------------------------------------------|
| hsa03040                       | Spliceosome                                                                                     | 9.403964    | 0.007283585 | 0.422050051 | PPIE, SRSF5, PQBP1, DDX5                                                                                                                                                                                                                                                                                                                                                                                                                                                                   |
| GO:0005737                     | cytoplasm                                                                                       | 1.55701     | 0.007004731 | 0.581736251 | NDUFAF6, HMGN3, HMGN2, COA1, RBM3, PML, CNOT1, MXI1, UBQLN1, RPS3, ST6GALNAC6, UFM1, ACTR6, RPLP0, PQBP1, C7ORF49, GSTZ1, GSKIP, PCMT1, PLEC, ZC3H14, ESPL1, TACC1, SAFB2, TARBP2, SRSF5, C21ORF2, TBCD, PARP2                                                                                                                                                                                                                                                                             |
| GO:0030529                     | intracellular ribonucleoprotein complex                                                         | 8.246154    | 0.012159351 | 0.780631246 | HNRNPH3, RPLP0, DDX5, RPS3                                                                                                                                                                                                                                                                                                                                                                                                                                                                 |
| GO:0005515                     | protein binding                                                                                 | 1.301709    | 0.011663251 | 0.819647637 | HMGN2, HP1BP3, RBM3, TAF1D, PML, TMEM218, CNOT1, UBQLN1, NPRL2, MXI1, RPS3, ACTG1, SFSWAP, RASGRP3, CLK3, ACTR6, RPLP0, C7ORF49, PQBP1, GSTZ1, PCMT1, PLEC, ZC3H14, C14ORF159, PLXNB2, MSH5, HLA-A, ESPL1, BCS1L, DDX5, TACC1, SAFB2, TMEM106C, TARBP2, PPIE, SRSF5, HNRNPH3, C21ORF2, TBCD, ATG16L1, PARP2, SNX11                                                                                                                                                                         |
| GO:0045111                     | intermediate filament cytoskeleton                                                              | 16.17515    | 0.0143809   | 0.834068141 | CLK3, TACC1, PLEC                                                                                                                                                                                                                                                                                                                                                                                                                                                                          |
| GO:0042277                     | peptide binding                                                                                 | 13.84445    | 0.019258097 | 0.941522231 | RPLP0, NLN, ERAP2                                                                                                                                                                                                                                                                                                                                                                                                                                                                          |
| GO:0005730                     | nucleolus                                                                                       | 2.617216    | 0.030135907 | 0.977501724 | ZC3H14, SRSF5, RBM3, PML, DDX5, MXI1, PARP2, RPS3                                                                                                                                                                                                                                                                                                                                                                                                                                          |
| <b>Intron retention events</b> |                                                                                                 |             |             |             |                                                                                                                                                                                                                                                                                                                                                                                                                                                                                            |
| hsa04145                       | Phagosome                                                                                       | 7.396774    | 5.78E-06    | 9.13E-04    | CYBA, HLA-A, TUBA4A, SCARB1, HLA-C, HLA-B, HLA-DOA, HLA-DMA, ATP6V0B, HLA-F                                                                                                                                                                                                                                                                                                                                                                                                                |
| hsa05332                       | Graft-versus-host disease                                                                       | 20.17302    | 9.10E-06    | 0.001437    | HLA-A, HLA-C, HLA-B, HLA-DOA, HLA-DMA, HLA-F                                                                                                                                                                                                                                                                                                                                                                                                                                               |
| hsa05330                       | Allograft rejection                                                                             | 17.99215    | 1.63E-05    | 0.002568    | HLA-A, HLA-C, HLA-B, HLA-DOA, HLA-DMA, HLA-F                                                                                                                                                                                                                                                                                                                                                                                                                                               |
| hsa04940                       | Type I diabetes mellitus                                                                        | 15.85023    | 3.07E-05    | 0.004838    | HLA-A, HLA-C, HLA-B, HLA-DOA, HLA-DMA, HLA-F                                                                                                                                                                                                                                                                                                                                                                                                                                               |
| GO:0005737                     | cytoplasm                                                                                       | 1.569262    | 2.49E-05    | 0.005271    | KIF22, HMGN2, NIT2, RBM3, RPS6KB2, ITSN2, MCM10, MAF1, DDX11, SPINT2, PRMT5, QKI, ZYX, EIF2B5, EXOSC8, RAN, DDX39B, TRIM41, PI4KA, MTA1, RRP8, MBD1, DDIT3, DAPK1, LILRB1, BBS2, PITPNM1, ARHGAP33, CAPN12, SPAG4, NEK8, CELF2, ZNF383, EEF1D, BIN2, UBE2T, LST1, ENDOV, ELMOD3, TUBGCP6, ATXN2L, TRIM69, NMRAL1, RASAL3, BDH2, SCARB1, RPL10A, BAZ2A, FGD3, SREBF1, SHMT2, MAP2K2, TONSL, KIF18B, RPS9, ILF3, SIRT7, U2AF1L4, PSMB9, NMT2, APOL3, ATF4, MRPL28, INVS, IRF7, HDAC6, ACTR10 |
| GO:0002479                     | antigen processing and presentation of exogenous peptide antigen via MHC class I, TAP-dependent | 13.42286    | 1.28E-05    | 0.009941    | CYBA, PSMD13, HLA-A, HLA-C, HLA-B, PSMB9, HLA-F                                                                                                                                                                                                                                                                                                                                                                                                                                            |
| hsa05320                       | Autoimmune thyroid disease                                                                      | 12.80211    | 8.76E-05    | 0.01375     | HLA-A, HLA-C, HLA-B, HLA-DOA, HLA-DMA, HLA-F                                                                                                                                                                                                                                                                                                                                                                                                                                               |
| GO:0042612                     | MHC class I protein complex                                                                     | 44.4759     | 8.26E-05    | 0.017352    | HLA-A, HLA-C, HLA-B, HLA-F                                                                                                                                                                                                                                                                                                                                                                                                                                                                 |
| hsa05416                       | Viral myocarditis                                                                               | 11.67912    | 1.36E-04    | 0.021332    | HLA-A, HLA-C, HLA-B, HLA-DOA, HLA-DMA, HLA-F                                                                                                                                                                                                                                                                                                                                                                                                                                               |
| GO:0030670                     | phagocytic vesicle membrane                                                                     | 12.43818    | 1.16E-04    | 0.024318    | CYBA, HLA-A, HLA-C, HLA-B, ATP6V0B, HLA-F                                                                                                                                                                                                                                                                                                                                                                                                                                                  |
| <b>Exon skipping events</b>    |                                                                                                 |             |             |             |                                                                                                                                                                                                                                                                                                                                                                                                                                                                                            |
| GO:0005737                     | cytoplasm                                                                                       | 1.582606682 | 3.54E-06    | 8.21E-04    | CAST, LDHA, SEC31A, AGTPBP1, NT5C3B, IFI44L, UBQLN1, NAP1L4, RPS3, WARS, MAX, CDCA7, CD44, HSF1, PCBP2, GSTZ1, ADAM8, MX1, CASP2, FANCA, USP15, ASPM, KIF13B, MRI1, SYNRG, OPA1, ARHGEF1, BRAF, INPPL1, NADSYN1, HCFC1R1, YTHDF1, MBNL1, PMM2, ISCU, TRNAU1AP, BPTF, VEGFA, CELF2,                                                                                                                                                                                                         |

|            |                           |             |             |             |                                                                                                                                                                                                                                                                                                                                                                                                                                                                                                                                                                                                                                                                                                                                                                                                                         |
|------------|---------------------------|-------------|-------------|-------------|-------------------------------------------------------------------------------------------------------------------------------------------------------------------------------------------------------------------------------------------------------------------------------------------------------------------------------------------------------------------------------------------------------------------------------------------------------------------------------------------------------------------------------------------------------------------------------------------------------------------------------------------------------------------------------------------------------------------------------------------------------------------------------------------------------------------------|
|            |                           |             |             |             | LRCH3, BIN1, CARM1, NEK6, USP3, CYTH1, HAUS2, FAM193B, MKNK2, CTNND1, VCPKMT, ZNF655, RCC1, BANF1, GCH1, STAT6, CHD1L, VRK3, MACF1, MSI2, KLHL42, RPS24, CHD3, HNRNPAB, TMC6, CRIP3, NASP, SMG7, MZB1, RPS9, ANKHD1, MPRIP, DRAM2, ANXA11, CD79B, TNK2, MYO19, EIF4E2, MPHOSPH8                                                                                                                                                                                                                                                                                                                                                                                                                                                                                                                                         |
| GO:0005515 | protein binding           | 1.308057272 | 2.43E-05    | 0.007633711 | CAST, MPZL1, LDHA, SEC31A, NT5C3B, RBM5, UBQLN1, EPC1, PICALM, CSNK2A1, CD44, CLK2, SUPT20H, ADAM8, MX1, KIF13B, OPA1, RCOR3, BRAF, BCL2A1, YIF1A, ISCU, LAT2, CHID1, VEGFA, LRCH3, BIN1, NEK6, PAM, ALDOC, MTX2, CCDC14, RCC1, BANF1, VRK3, MACF1, HNRNPC, POLQ, HNRNPAB, NIN, SMG7, RPS9, MPRIP, POC1A, APOL1, ARMC8, CD79B, NUTF2, TNK2, EIF4E2, NCOR2, MLH3, NAP1L4, SCIMP, RPS3, WARS, MAX, HSF1, GRIPAP1, P4HA1, SLMAP, PCBP2, GSTZ1, IGF1R1, FANCA, CASP2, USP15, SYNRG, ARHGEF1, ARHGEF7, INPPL1, NADSYN1, CCNC, MBNL1, PMM2, MTMR14, BPTF, EIF4A2, SDCCAG3, CARM1, SNX10, MEGF8, EXOC7, CYTH1, MKNK2, BTN2A2, CTNND1, VCPKMT, ZNF655, ITM2C, GCH1, STAT6, CHD1L, KLC1, PIKFYVE, CD22, MSI2, KLHL42, CHD3, IL18R1, CPT1B, TMC6, MSH5, NASP, ANKHD1, PCK2, MON2, ANXA11, ZC3H11A, CENPU, MPHOSPH8, WDR20, SH3BP2 |
| GO:0005829 | cytosol                   | 1.630053667 | 2.68E-04    | 0.06023605  | CAST, LDHA, SEC31A, NT5C3B, AGTPBP1, GPCPD1, RPS3, WARS, CSNK2A1, HSF1, PCBP2, GSTZ1, MX1, CASP2, KIF13B, MRI1, ARHGEF1, BRAF, ARHGEF7, INPPL1, NADSYN1, DGUOK, PMM2, ISCU, MTMR14, TRAPPC9, EIF4A2, MGEA5, CARM1, NEK6, ATG10, EXOC7, PFKFB4, CYTH1, HAUS2, ALDOC, CTNND1, BANF1, GCH1, STAT6, KLC1, PIKFYVE, HNRNPC, RPS24, SMG7, RPS9, MON2, NUTF2, CENPU, PHPT1, EIF4E2                                                                                                                                                                                                                                                                                                                                                                                                                                             |
| GO:0044822 | poly(A) RNA binding       | 2.161759527 | 6.39E-04    | 0.182271325 | CAST, ARHGEF1, RBM5, RPS9, MBNL1, YTHDF1, ANKHD1, NAP1L4, RPS3, TRNAU1AP, MACF1, EIF4A2, SRRM2, PCBP2, ANXA11, MSI2, CELF2, ZC3H11A, HNRNPC, ALG13, EIF4E2, CHD3, HNRNPAB, RPS24                                                                                                                                                                                                                                                                                                                                                                                                                                                                                                                                                                                                                                        |
| GO:0005654 | nucleoplasm               | 1.598436247 | 0.00182193  | 0.344969423 | HAUS2, FAM193B, RBM5, MKNK2, IFI44L, UBQLN1, RCC1, BANF1, RPS3, GCH1, STAT6, MAX, EPC1, CHD1L, CDCA7, CSNK2A1, HSF1, CLK2, SRRM2, PCBP2, HNRNPC, POLQ, FANCA, HNRNPAB, CHD3, RPS24, OPA1, NASP, RPS9, CCNC, MBNL1, ANKHD1, BPTF, MSL1, ANXA11, CD79B, ZC3H11A, NUTF2, CENPU, CARM1, NEK6, NCOR2                                                                                                                                                                                                                                                                                                                                                                                                                                                                                                                         |
| hsa04910   | Insulin signaling pathway | 4.673233696 | 0.008365255 | 0.650081496 | EXOC7, BRAF, INPPL1, MKNK2, PCK2, EIF4E2                                                                                                                                                                                                                                                                                                                                                                                                                                                                                                                                                                                                                                                                                                                                                                                |
| GO:0030983 | mismatched DNA binding    | 27.73439211 | 0.004928929 | 0.789116956 | MSH5-SAPCD1, MSH5, MLH3                                                                                                                                                                                                                                                                                                                                                                                                                                                                                                                                                                                                                                                                                                                                                                                                 |
| GO:0051225 | spindle assembly          | 15.26198591 | 0.002174868 | 0.850540112 | HAUS2, RCC1, NEK6, RPS3                                                                                                                                                                                                                                                                                                                                                                                                                                                                                                                                                                                                                                                                                                                                                                                                 |
| GO:0000790 | nuclear chromatin         | 3.842872635 | 0.009835961 | 0.899061082 | STAT6, PAM, USP3, NASP, HNRNPC, RCC1, NCOR2                                                                                                                                                                                                                                                                                                                                                                                                                                                                                                                                                                                                                                                                                                                                                                             |
| GO:0005634 | nucleus                   | 1.291399858 | 0.011879816 | 0.937501905 | MEF2B, LDHA, AGTPBP1, RBM5, MLH3, NAP1L4, RPS3, WARS, MAX, EPC1, CSNK2A1, PICALM, CDCA7, HSF1, CLK2, PCBP2, MX1, CASP2, FANCA, USP15, ASPM, IZUMO4, SDR39U1, RCOR3, BRAF, MBD5, HCFC1R1, CCNC, MBNL1, DGUOK, ISCU, TRNAU1AP, ZNF195, CHID1, BPTF, MGEA5, CELF2, PRDM2, CARM1, NEK6, SNX10, MEGF8, USP3, FAM193B, MKNK2, CTNND1, RABGAP1L, ZNF655, RCC1, BANF1, GCH1, STAT6, CHD1L, VRK3, HNRNPC, RPS24, CHD3, HNRNPAB, SP140L, NASP, SMG7, RPS9, TNK2, CENPU, MPHOSPH8, NCOR2                                                                                                                                                                                                                                                                                                                                           |

\*GO, Gene ontology, <http://geneontology.org/> ; dre, KEGG pathway, <https://www.genome.jp/kegg/pathway.html>.

\*\* Proportion of genes found over hits found in background (percent genes found from query / percent hits found in background)

‡ DAVID derived p-value (Fisher's exact test)

^ p-value

**Supplementary Table 7. Gene ontology enrichment analysis using proteins identified by mass spectrometry.**

| GO term*     | Description                                  | Observed | Expected | Fold enrichment | P value** |
|--------------|----------------------------------------------|----------|----------|-----------------|-----------|
| (GO:0030623) | U5 snRNA binding                             | 2        | 0.01     | > 100           | 1.33E-02  |
| (GO:0033677) | DNA/RNA helicase activity                    | 2        | 0.01     | > 100           | 2.08E-02  |
| (GO:0030620) | U2 snRNA binding                             | 2        | 0.02     | 83.98           | 4.02E-02  |
| (GO:0070180) | large ribosomal subunit rRNA binding         | 2        | 0.02     | 83.98           | 3.94E-02  |
| (GO:0048027) | mRNA 5'-UTR binding                          | 8        | 0.12     | 67.19           | 1.26E-09  |
| (GO:0003735) | structural constituent of ribosome           | 32       | 0.83     | 38.61           | 4.90E-37  |
| (GO:0017116) | single-stranded DNA helicase activity        | 3        | 0.09     | 34.99           | 1.32E-02  |
| (GO:0008143) | poly(A) binding                              | 3        | 0.1      | 31.49           | 1.64E-02  |
| (GO:0016875) | ligase activity, forming carbon-oxygen bonds | 6        | 0.2      | 29.99           | 2.00E-05  |
| (GO:0004812) | aminoacyl-tRNA ligase activity               | 6        | 0.2      | 29.99           | 1.92E-05  |
| (GO:0019843) | rRNA binding                                 | 8        | 0.3      | 26.24           | 6.02E-07  |
| (GO:0070717) | poly-purine tract binding                    | 3        | 0.12     | 24.23           | 3.13E-02  |
| (GO:0003730) | mRNA 3'-UTR binding                          | 10       | 0.45     | 22.34           | 3.08E-08  |
| (GO:0000049) | tRNA binding                                 | 7        | 0.31     | 22.27           | 1.36E-05  |
| (GO:0003724) | RNA helicase activity                        | 8        | 0.38     | 21.26           | 2.59E-06  |
| (GO:0017069) | snRNA binding                                | 4        | 0.2      | 20              | 7.85E-03  |
| (GO:0003725) | double-stranded RNA binding                  | 6        | 0.35     | 17.02           | 3.15E-04  |
| (GO:0003729) | mRNA binding                                 | 19       | 1.31     | 14.51           | 9.90E-14  |
| (GO:0004386) | helicase activity                            | 11       | 0.79     | 13.91           | 2.86E-07  |
| (GO:0003723) | RNA binding                                  | 83       | 8.03     | 10.34           | 5.76E-69  |

\*GO, Gene ontology; molecular function complete, <http://geneontology.org/>

\*\* FDR corrected p-value (Kolmogorov-Smirnov test)

## Supplementary Notes

### Supplementary Note 1: Clinical case reports

We reported previously the complete clinical details on K8100<sup>1</sup>. A summary of the clinical findings at last clinical examination for two affected males in K8100 (IV-1 and IV-2) and four unrelated affected males in K9648, K9656, K9667, K9677 are summarized in Table 1.

Family K8100. Affected males IV-1 and IV-2, ages 28 and 24 years, respectively, have shown lifelong cognitive impairment requiring special education throughout their school years. They have short stature and head size >80th centile. The elder brother has prominence of the forehead, downslanting palpebral fissures, short philtrum, a vaulted palate, placement of two mandibular incisors behind the other two, large jaw, small hands and small feet. He has generalized stiffness at all joints, limited extension of all large joints and asymmetric reflexes. Grand mal seizures occurred from years 3 to 8 years. He has myopia, repaired cleft palate and unilateral cryptorchidism. He has an even-tempered demeanor, is friendly and sedentary. The younger brother has a similar developmental history and growth pattern except that he has a lower body mass index (BMI) than his brother. His forehead was not prominent, palpebral fissures were minimally downslanted, alveolar ridges were thick, palate narrow and vaulted, and his teeth were crowded. He has myopia, low posterior hairline, webbed neck, small hands and feet, lower limb hyperreflexia, joint limitation, petit mal seizures and behavioral problems with aggressiveness.

Family K9648. The proband is the only affected male in this kindred. At birth, he had normal length and weight measurements, Tetralogy of Fallot, horseshoe kidney and cryptorchidism. He has prominent forehead, bitemporal narrowing, proptosis, hypotelorism, Axenfeld-Rieger anomaly with glaucoma, large prominent left ear, tubular nose and prominent lips, single central incisor, hypodontia, coxa valga, kyphoscoliosis, small hands and feet, a sacral dimple and a lipoma over the lower spine. His development was globally delayed, his height fell below the third centile, he required G-tube feedings, he had no speech and uses a wheelchair in mid-childhood.

Family K9656. The affected male in this kindred had birth measurements in the normal range, a small atrial septal defect, unilateral renal agenesis and a two vessel cord. He has hemangiomas between the brows and at the back of the neck, epicanthus, infraorbital creases, wide nasal root and a short nose. The ears are slightly posteriorly rotated. He has hypotonia and increased joint

flexibility as well as fleshy hands and fingers. He has micropenis and a small scrotum, and a history of inguinal hernia. Development has been globally delayed. He has a history of failure to thrive, up to age 5 ½ years, with height and weight below the 3<sup>rd</sup> centiles but a preserved head circumference. By age 10 years he developed obesity and gynecomastia. Despite significantly delayed milestones, his intellectual disability is mild.

Family K9667. The affected male had birth measurements in the 20th-25th centiles and cryptorchidism at birth. He had normal growth, small hands and feet, exotropia, myopia, excessively folded helices, a bulbous nose, hiatal hernia and a sacral dimple with tethered cord. He had hypotonia and hypertonia, drooling, dysphagia, constipation, and jerky limb movements that do not appear to be seizures. He had global developmental delay and at 8 years had an IQ below 50, no speech, walked with a gait trainer, and experienced sleep disturbance, and incontinence.

Family K9677. The affected male in this kindred was large at birth and had imperforate anus. He had macrocephaly, facial hemangiomas, exotropia, keratoconus, nystagmus, excessively folded helices, wide nasal tip, hypodontia, micrognathia, umbilical hernia, and bilateral clubfoot. His development was globally delayed, he developed seizures at age 9 years, had hypotonia, tremor of the hands and small hands and feet. He had mild intellectual disability, lived in a group home, had useful speech, independent ambulation and experiences mood lability and impulsiveness.

## Supplementary References

- 1 Armfield, K. *et al.* X-linked mental retardation syndrome with short stature, small hands and feet, seizures, cleft palate, and glaucoma is linked to Xq28. *Am J Med Genet* **85**, 236-242 (1999).
