# Supplementary material for: Mutations in FAM50A suggest that Armfield XLID syndrome is a spliceosomopathy
Source: PubMed Central journal article supplement (PMC7378245; doi:10.1038/s41467-020-17452-6), 2020-07-23
Supplement: 41467_2020_17452_MOESM3_ESM.pdf [file 41467_2020_17452_MOESM3_ESM.pdf]

## Description of Additional Supplementary Files

**File name:** Supplementary Data 1

**Description:** List of proteins identified by FAM50A pulldown and mass spectrometry analysis.
